# Supplementary material for: Synthesis of triphyrin(2.1.1)-triphyrin(2.1.1) homo dimers and bis-Re(i) triphyrin dimer complex
Source: Royal Society of Chemistry journal article supplement (doi:10.1039/d4dt01448k), 2024-01-01
Supplement: d4dt01448k1.pdf [file d4dt01448k1.pdf]

# Synthesis of Triphyrin(2.1.1)-Triphyrin(2.1.1) Homo Dimers and Bis-Re(I) Triphyrin Dimer Complex

Gurpreet Kaur and Mangalampalli Ravikanth\*

Department of Chemistry, Indian Institute of Technology Bombay, Powai, Mumbai 400076,

India, E-mail: [ravikanth@chem.iitb.ac.in](mailto:ravikanth@chem.iitb.ac.in)

| Sr. no. | Contents                                                                                                                                               | Page no.       |
|---------|--------------------------------------------------------------------------------------------------------------------------------------------------------|----------------|
| 1.      | <b>Figures S1-S12:</b> HRMS, $^1\text{H}$ and $^{13}\text{C}\{^1\text{H}\}$ NMR spectra of compounds <b>3-5</b> and <b>4-Re</b> .                      | <b>S2-S13</b>  |
| 2.      | <b>Figures S13-S18:</b> HRMS and $^1\text{H}$ NMR spectra of compounds <b>2-O(CH<sub>2</sub>)<sub>n</sub>-OH</b> .                                     | <b>S14-S19</b> |
| 3.      | <b>Figures S19-S25:</b> $^1\text{H}$ - $^1\text{H}$ COSY and NOESY spectra of compounds <b>4</b> and <b>4-Re</b> .                                     | <b>S20-S25</b> |
| 4.      | <b>Figure S26:</b> $^1\text{H}$ NMR spectra of Compound <b>4</b> at variable low temperature.                                                          | <b>S26</b>     |
| 5.      | <b>Figure S27:</b> Protonation $^1\text{H}$ -NMR of compound <b>4</b> .                                                                                | <b>S27</b>     |
| 6.      | <b>Figure S28:</b> Comparison of $^1\text{H}$ NMR spectra of the compound <b>4</b> with different concentrations of TFA.                               | <b>S28</b>     |
| 7.      | <b>Figure S29:</b> $^1\text{H}$ NMR titration of Compound <b>4.4H<sup>+</sup></b> at variable low temperature.                                         | <b>S29</b>     |
| 8.      | <b>Figure S30:</b> Absorption spectra of <b>2-5</b> and <b>4-Re</b> .                                                                                  | <b>S30</b>     |
| 9.      | <b>Figures S31:</b> Absorption spectra of <b>2-5</b> along with their protonated species.                                                              | <b>S31</b>     |
| 10.     | <b>Figures S32:</b> Absorption spectra of <b>4</b> with different acids.                                                                               | <b>S32</b>     |
| 11.     | <b>Figures S33:</b> Absorption spectra of <b>2-O(CH<sub>2</sub>)<sub>n</sub>-OH</b> along with their protonated species.                               | <b>S32</b>     |
| 12.     | <b>Figure S34:</b> Electrochemical data for the compounds <b>2-5</b> and <b>4-Re</b> .                                                                 | <b>S33</b>     |
| 13.     | <b>Figure S35:</b> Electrochemical data for the compounds <b>2-O(CH<sub>2</sub>)<sub>n</sub>-OH</b> .                                                  | <b>S34</b>     |
| 14.     | <b>Figure S36-S37:</b> DFT optimized structure for <b>3-5</b> and <b>4.4H<sup>+</sup></b> .                                                            | <b>S35</b>     |
| 15.     | <b>Figure 38:</b> DFT optimized structure for <b>5</b> ( <i>anti</i> ) and <b>5'</b> ( <i>syn</i> ) conformations.                                     | <b>S36</b>     |
| 16.     | <b>Figure S39:</b> DFT optimized structure for different possibilities of <b>4-Re</b> .                                                                | <b>S36</b>     |
| 17.     | <b>Figure S40:</b> Selected FMOs for compounds <b>3</b> and <b>5</b> .                                                                                 | <b>S37</b>     |
| 18.     | <b>Table S1-S6:</b> Cartesian coordinate for the optimized geometry of compounds <b>3-5</b> , <b>4.4H<sup>+</sup></b> , <b>4-Re</b> and <b>4-Re'</b> . | <b>S37-S50</b> |

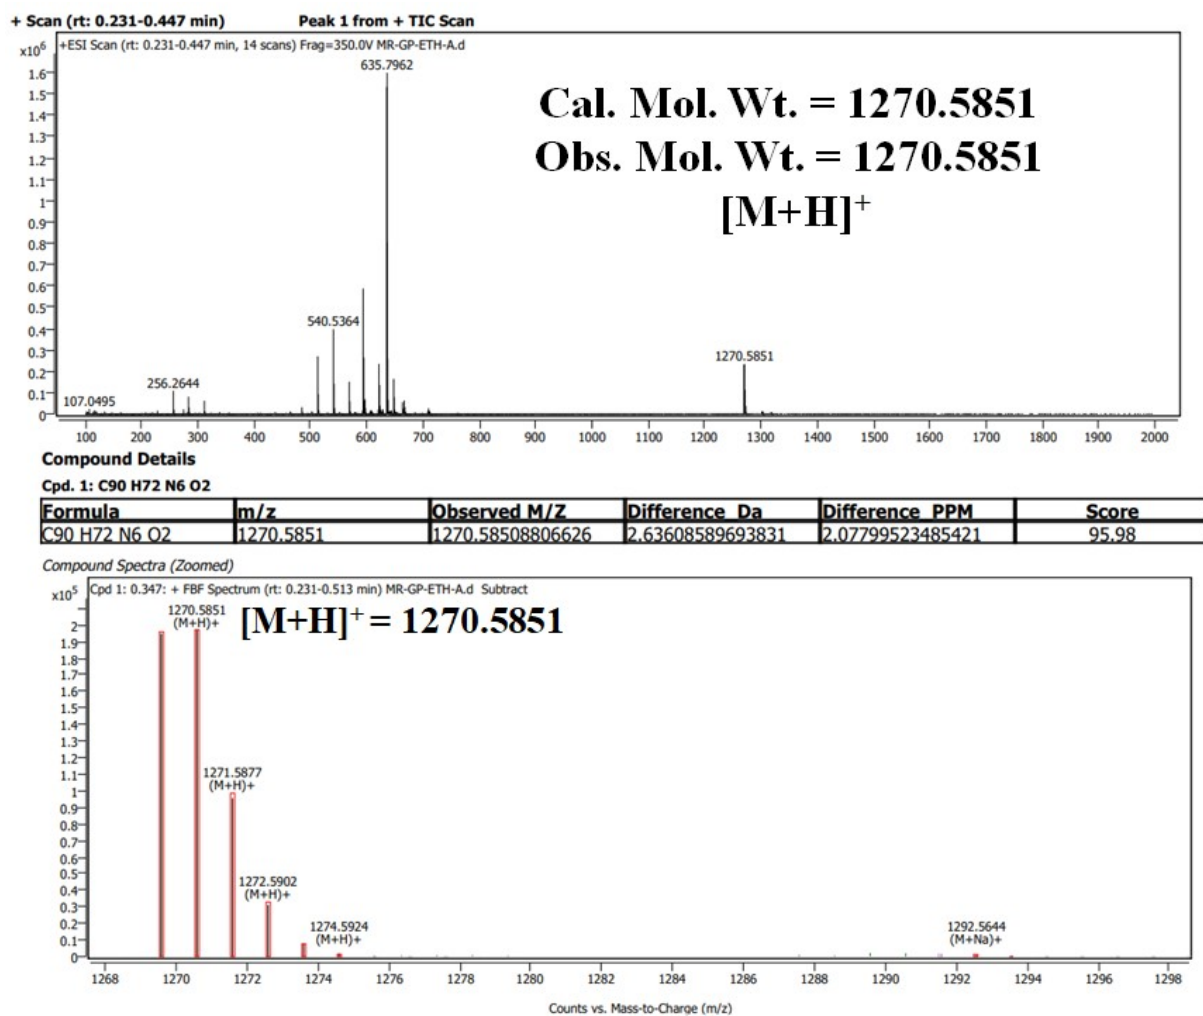

Figure S1. HR mass spectrum of the compound **3**.

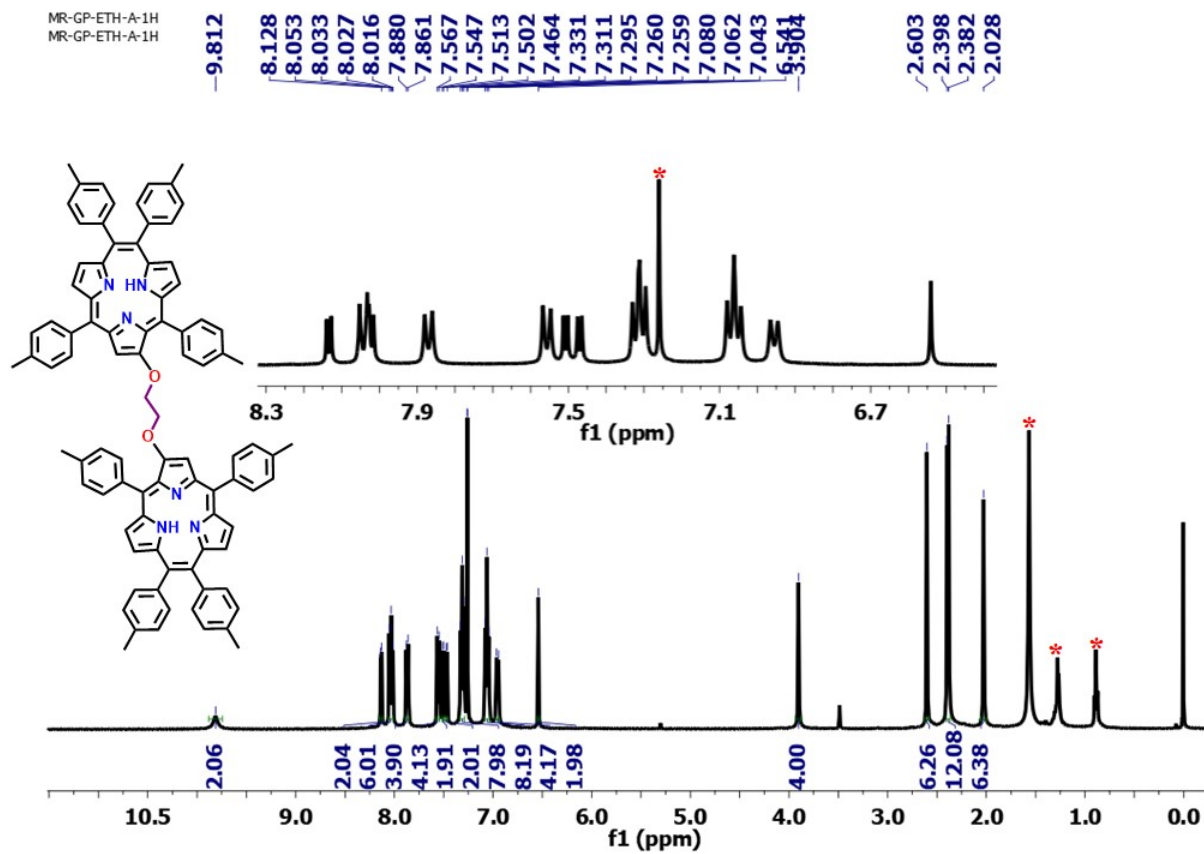

**Figure S2.**  $^1\text{H}$  NMR spectrum of the compound **3** recorded in  $\text{CDCl}_3$  on 400 MHz FT-NMR spectrometer. Note: Peaks marked with asterisk (\*) are due to residual solvents.

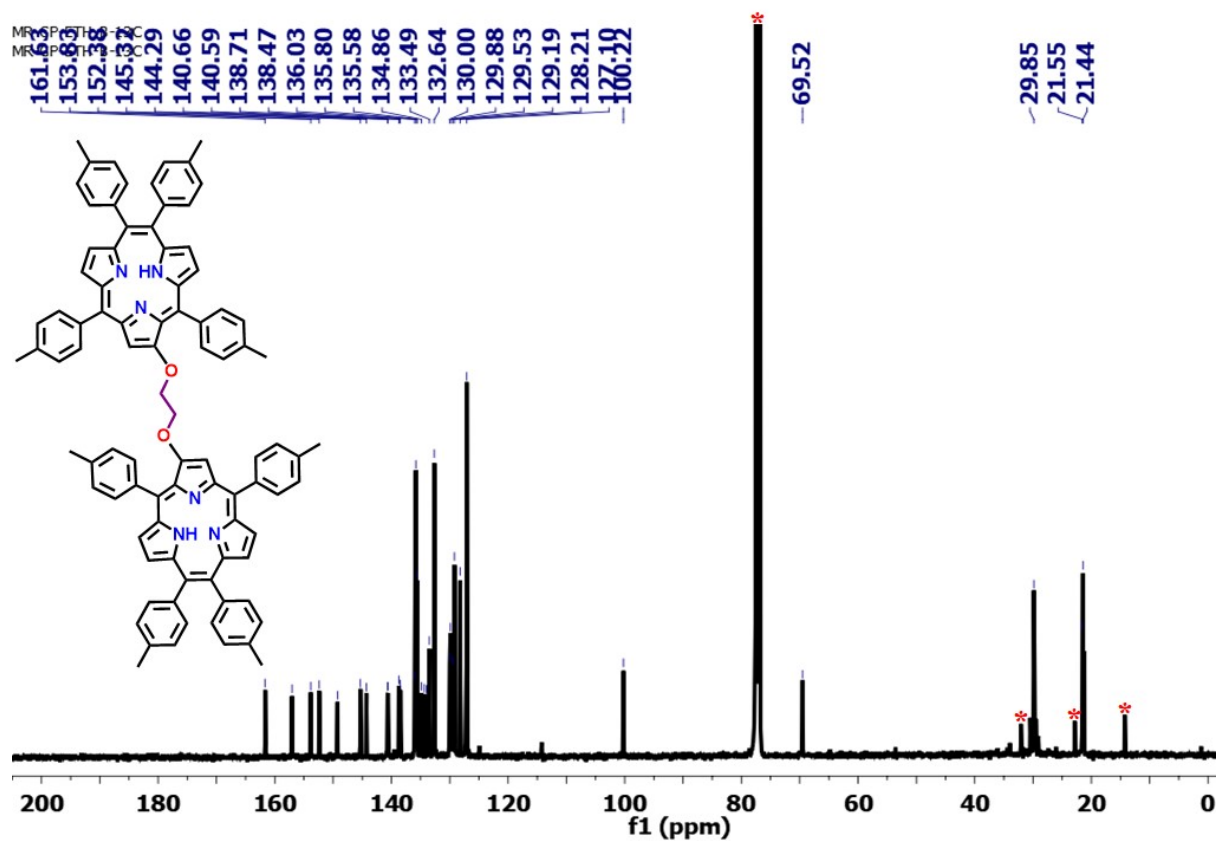

**Figure S3.**  $^{13}\text{C}\{^1\text{H}\}$  NMR spectrum of the compound **3** recorded in  $\text{CDCl}_3$  on 101 MHz FT-NMR spectrometer. Note: Peaks marked with asterisk (\*) are due to residual solvents.

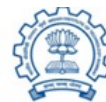

Sample name (file name prefix)

MR-GP-BUT\0\_L7\1

Comment 1

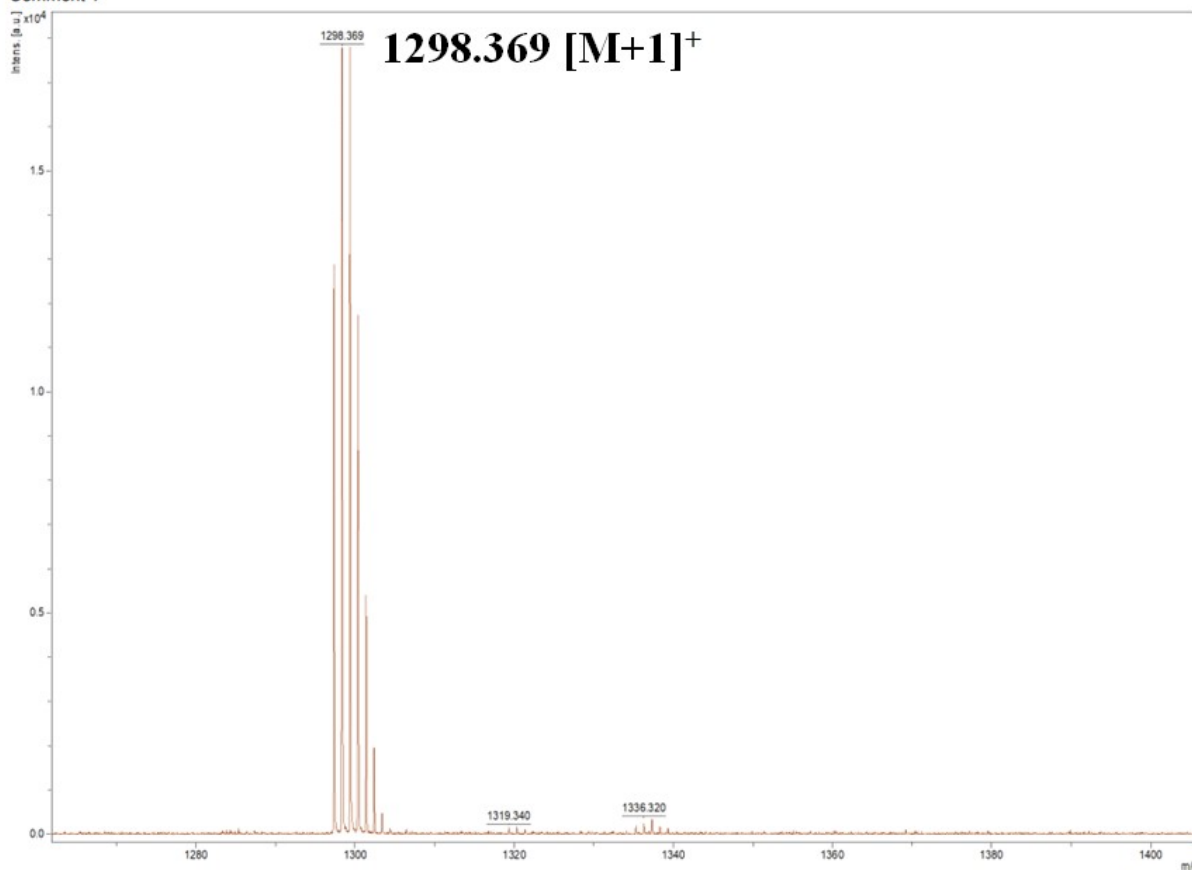

**Figure S4.** MALDI-TOF mass spectrum of the compound **4**.

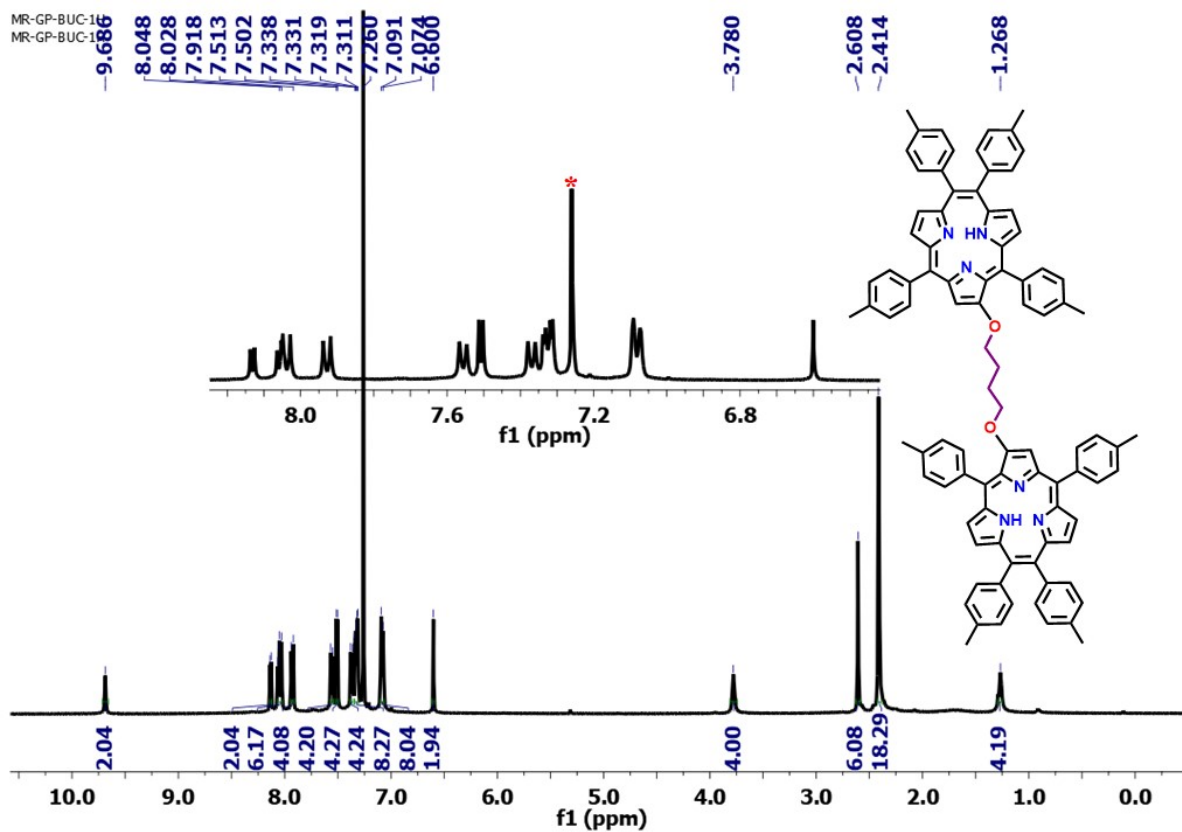

**Figure S5.**  $^1\text{H}$  NMR spectrum of the compound **4** recorded in  $\text{CDCl}_3$  on 400 MHz FT-NMR spectrometers. Note: Peaks marked with asterisk (\*) are due to residual solvents.

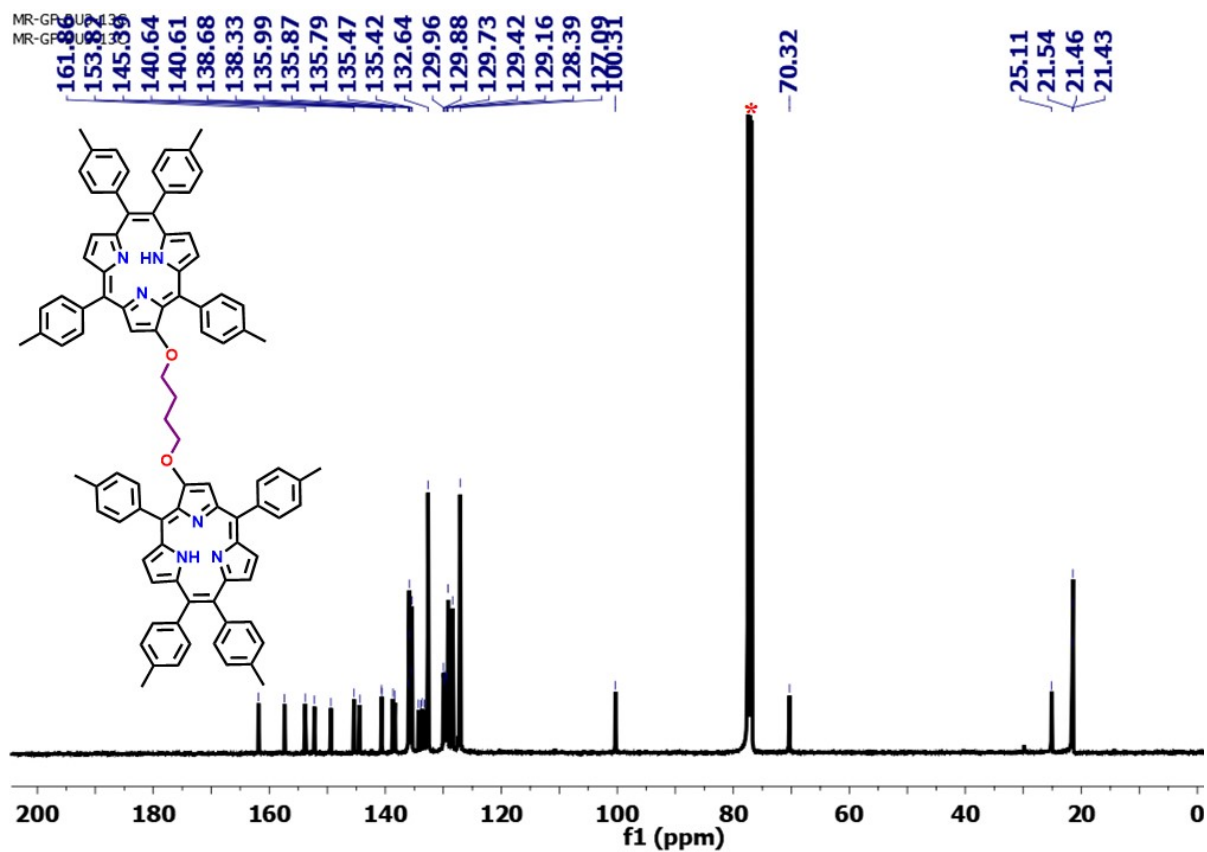

**Figure S6.**  $^{13}\text{C}\{^1\text{H}\}$  NMR spectrum of the compound **4** recorded in  $\text{CDCl}_3$  on 101 MHz FT-NMR spectrometer. Note: Peaks marked with asterisk (\*) are due to residual solvents.

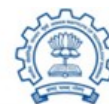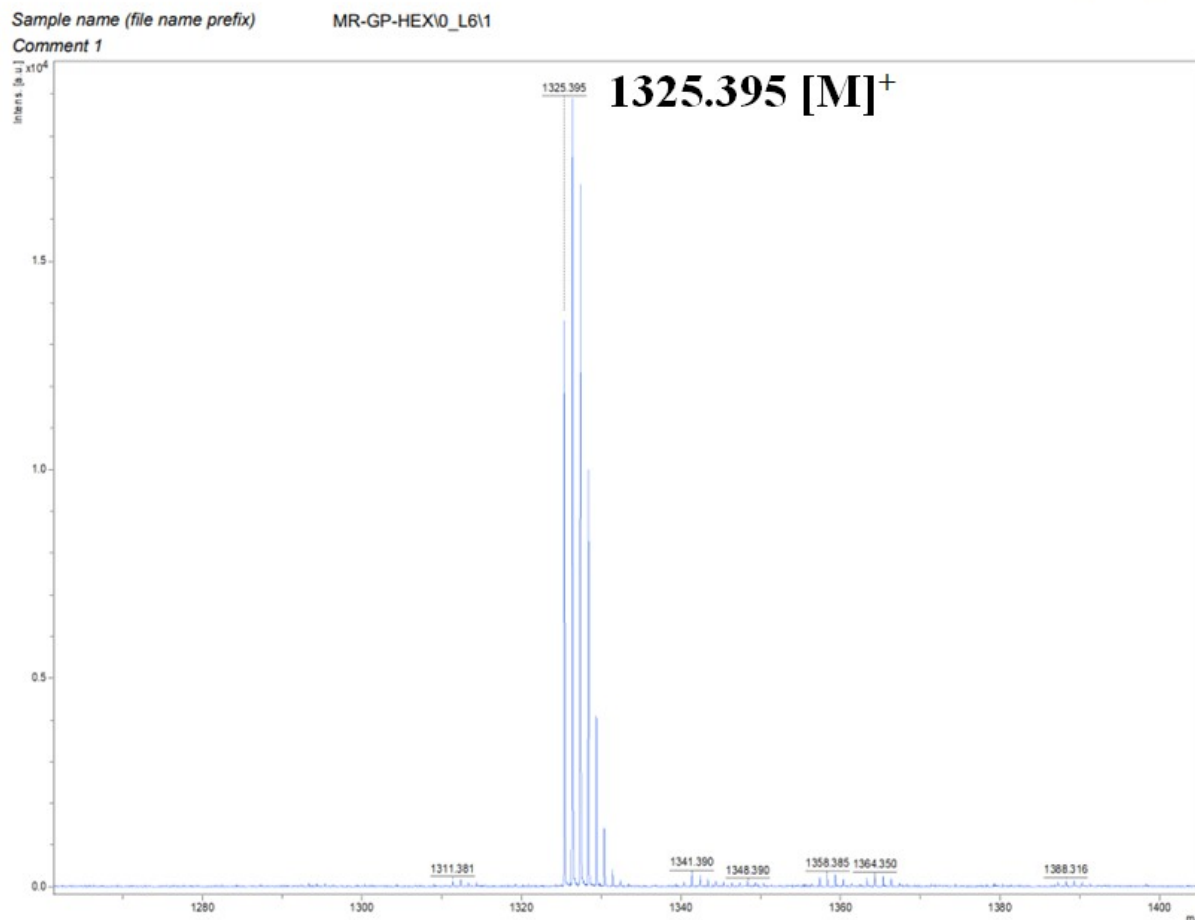

**Figure S7.** MALDI-TOF mass spectrum of the compound **5**.



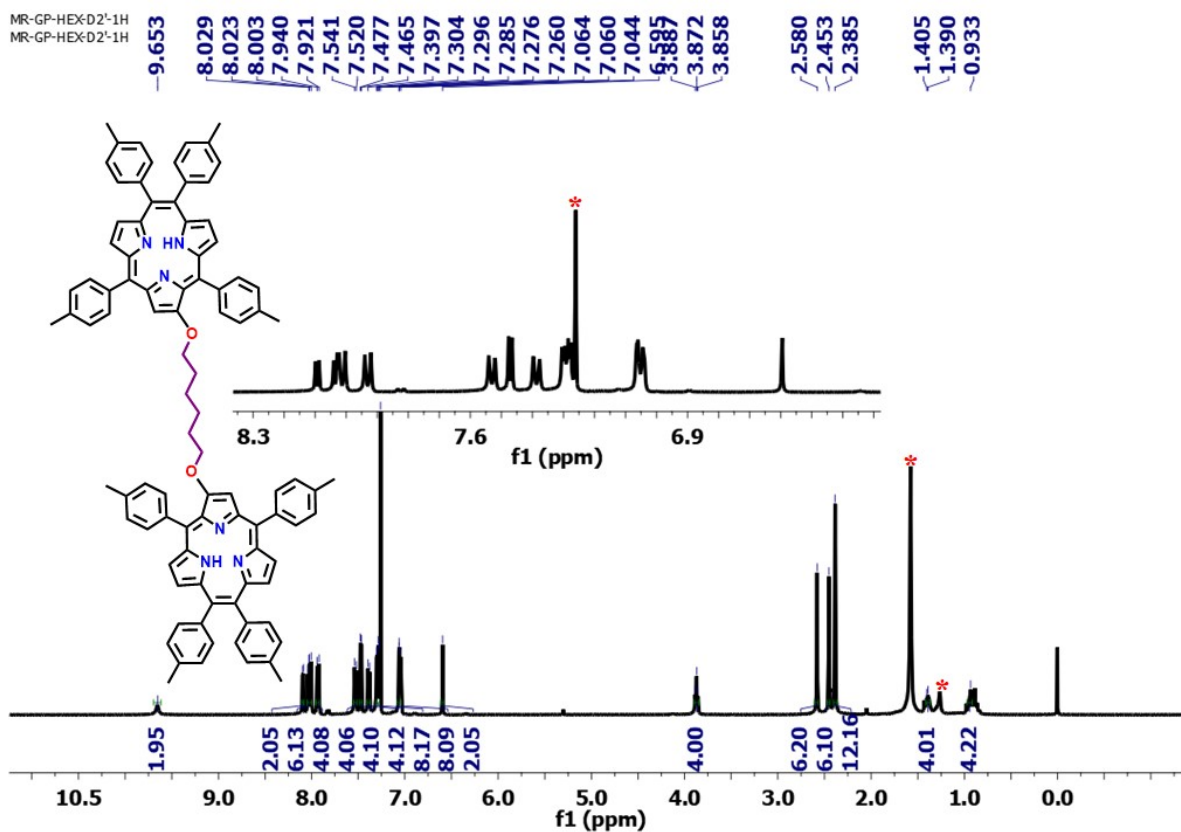

**Figure S8.** <sup>1</sup>H NMR spectrum of the compound **5** recorded in CDCl<sub>3</sub> on 400 MHz FT-NMR spectrometer. Note: Peaks marked with asterisk (\*) are due to residual solvents.

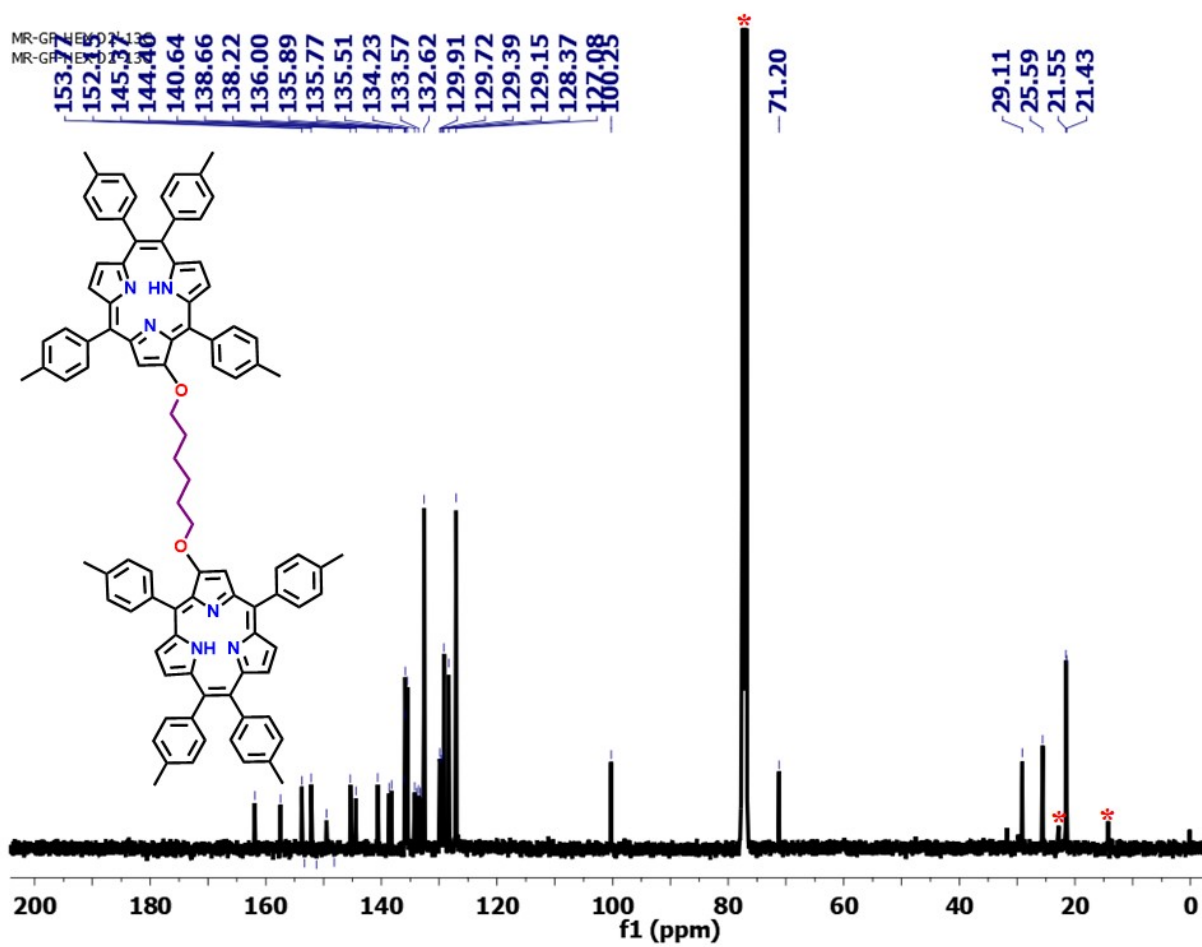

**Figure S9.**  $^{13}\text{C}\{^1\text{H}\}$  NMR spectrum of the compound **5** recorded in  $\text{CDCl}_3$  on 101 MHz FT-NMR spectrometer. Note: Peaks marked with asterisk (\*) are due to residual solvents.

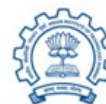

Sample name (file name prefix)  
Comment 1

MR-GP-RE10\_N211

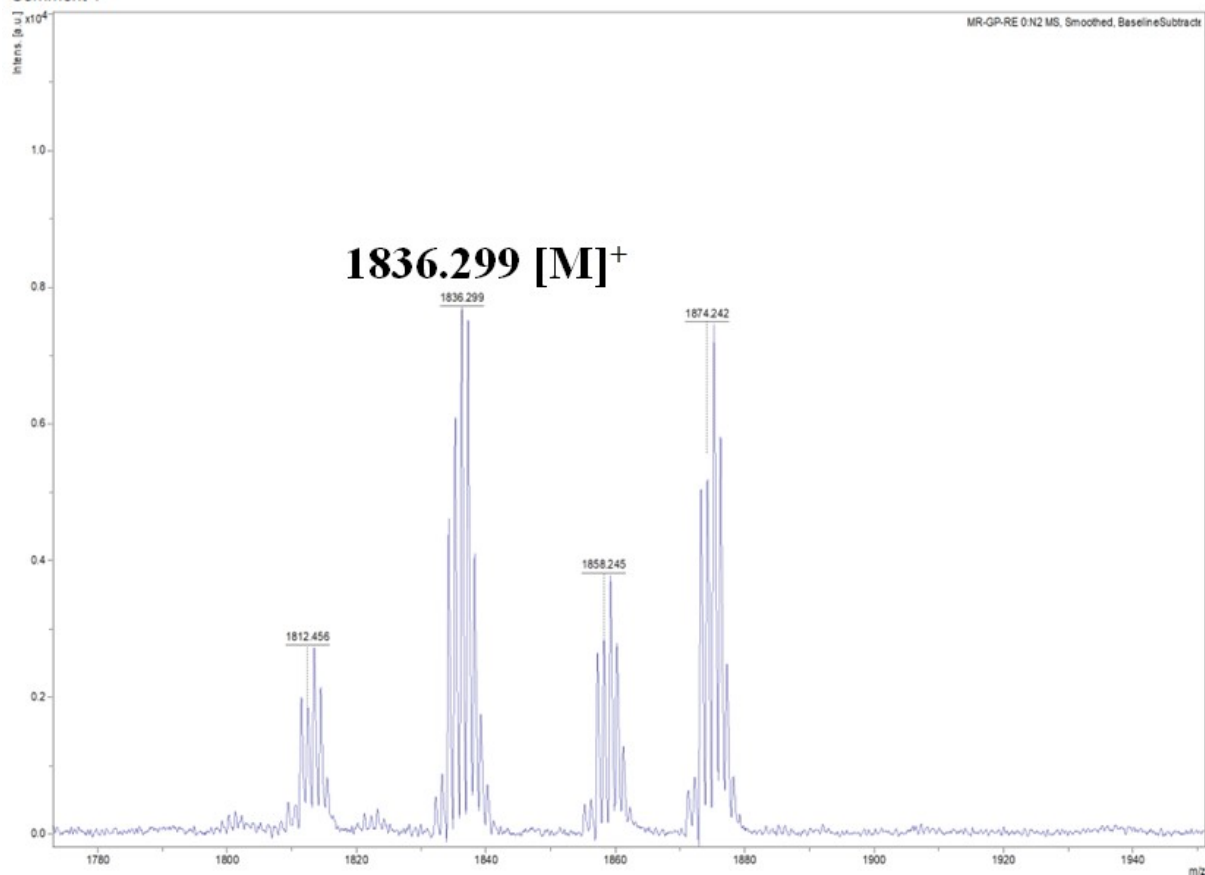

**Figure S10.** MALDI-TOF mass spectrum of the compound **4-Re**.

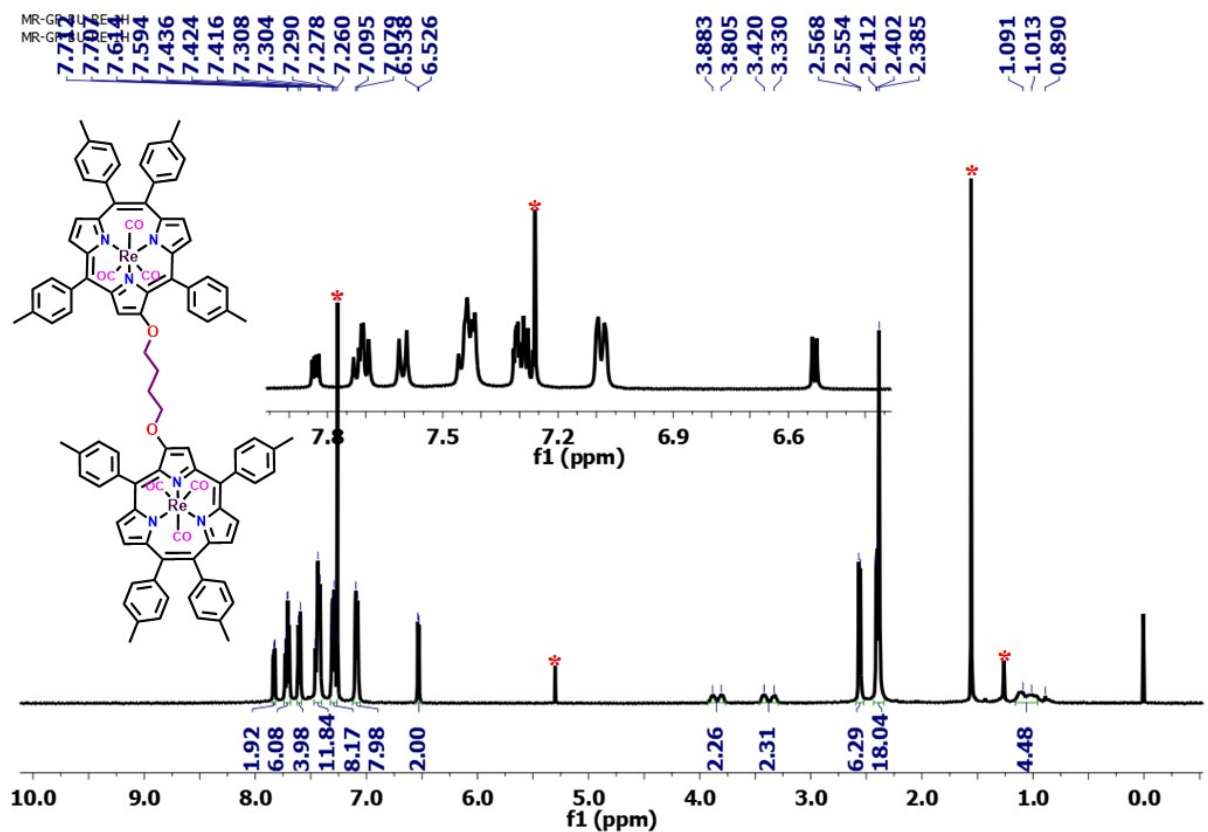

**Figure S11.** <sup>1</sup>H NMR spectrum of the compound **4-Re** recorded in CDCl<sub>3</sub> on 400 MHz FT-NMR spectrometer. Note: Peaks marked with asterisk (\*) are due to residual solvents.

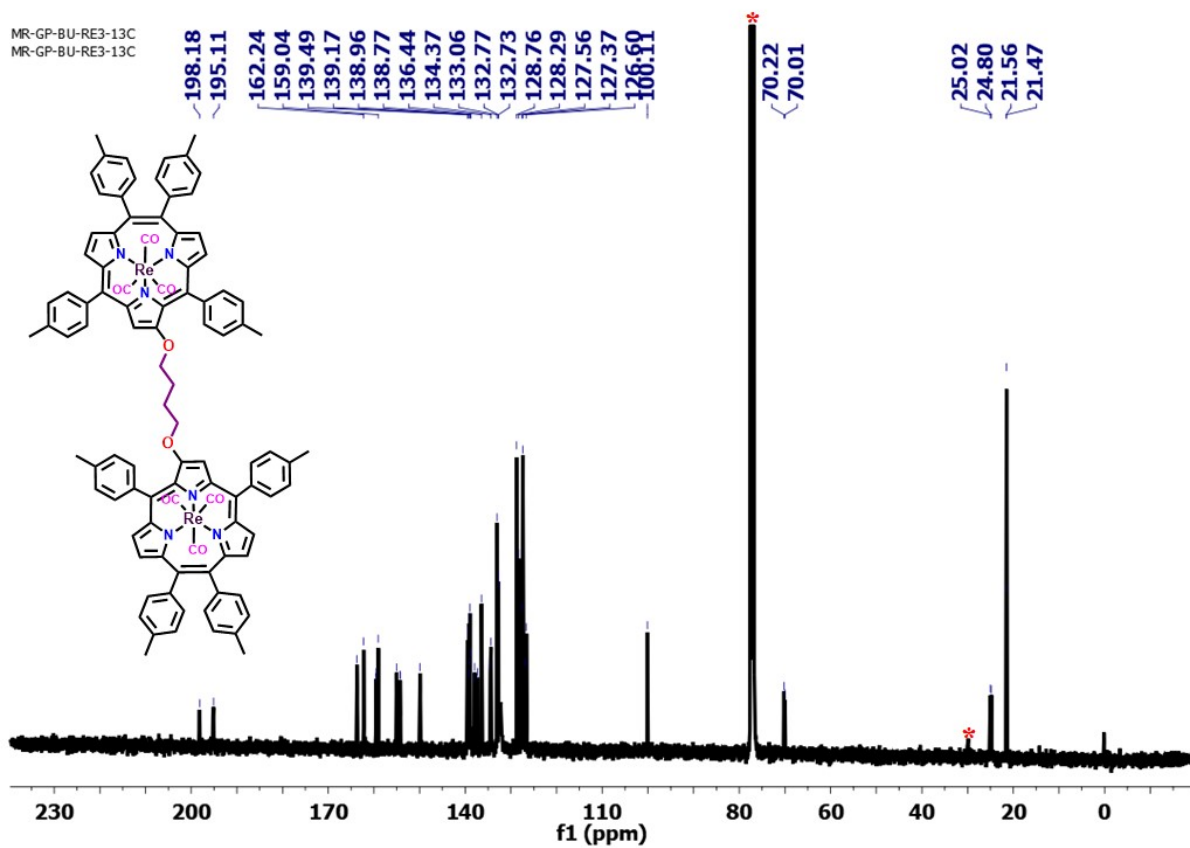

**Figure S12.**  $^{13}\text{C}\{^1\text{H}\}$  NMR spectrum of the compound **4-Re** recorded in  $\text{CDCl}_3$  on 101 MHz FT-NMR spectrometer. Note: Peaks marked with asterisk (\*) are due to residual solvents.

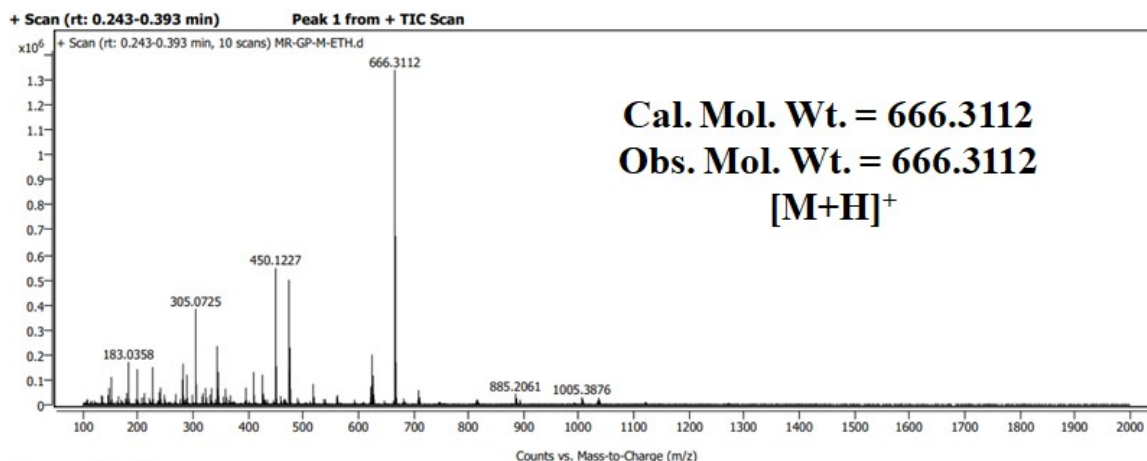

Compound Details

Cpd. 1: C<sub>46</sub>H<sub>39</sub>N<sub>3</sub>O<sub>2</sub>

| Formula                                                       | m/z      | Observed M/Z    | Difference Da      | Difference PPM     | Score |
|---------------------------------------------------------------|----------|-----------------|--------------------|--------------------|-------|
| C <sub>46</sub> H <sub>39</sub> N <sub>3</sub> O <sub>2</sub> | 666.3112 | 666.31129881309 | -0.140091257208041 | -0.210567213336618 | 99.79 |

Compound Spectra (Zoomed)

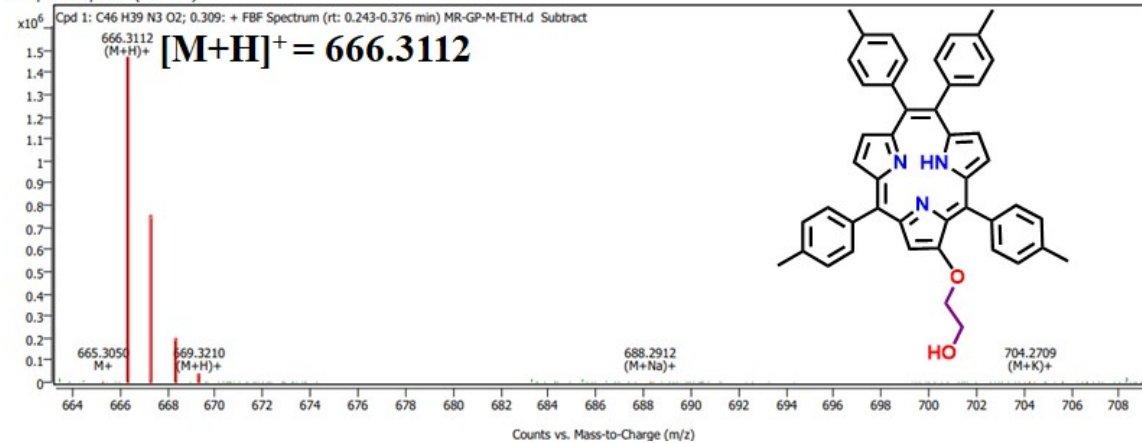

Figure S13. HR mass spectrum of the compound 2-O(CH<sub>2</sub>)<sub>2</sub>-OH.

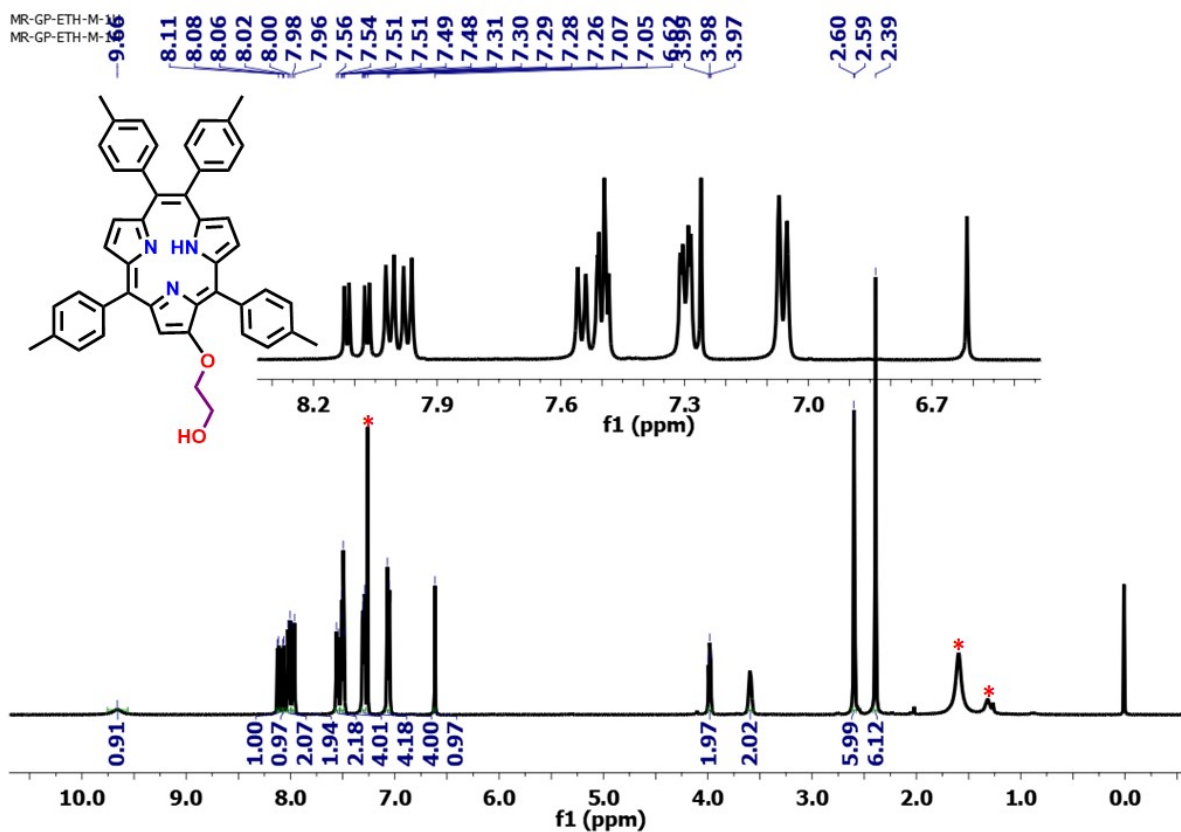

**Figure S14.**  $^1\text{H}$  NMR spectrum of the compound  $2\text{-O}(\text{CH}_2)_2\text{-OH}$  recorded in  $\text{CDCl}_3$  on 400 MHz FT-NMR spectrometer. Note: Peaks marked with asterisk (\*) are due to residual solvents.

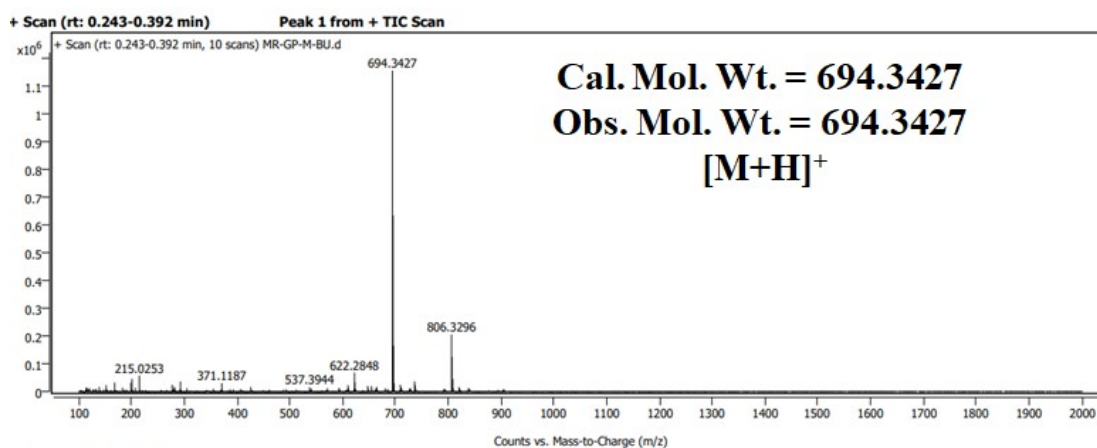

Compound Details

Cpd. 1: C<sub>48</sub>H<sub>43</sub>N<sub>3</sub>O<sub>2</sub>

| Formula                                                       | m/z      | Observed M/Z    | Difference Da      | Difference PPM     | Score |
|---------------------------------------------------------------|----------|-----------------|--------------------|--------------------|-------|
| C <sub>48</sub> H <sub>43</sub> N <sub>3</sub> O <sub>2</sub> | 694.3427 | 694.34265938366 | 0.0252378882805715 | 0.0364006852014806 | 99.71 |

Compound Spectra (Zoomed)

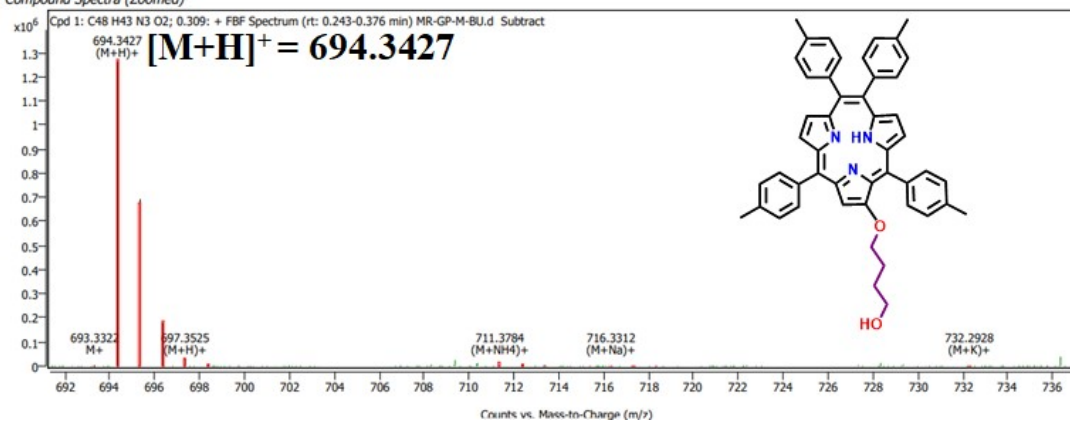

Figure S15. HR mass spectrum of the compound 2-O(CH<sub>2</sub>)<sub>4</sub>-OH.



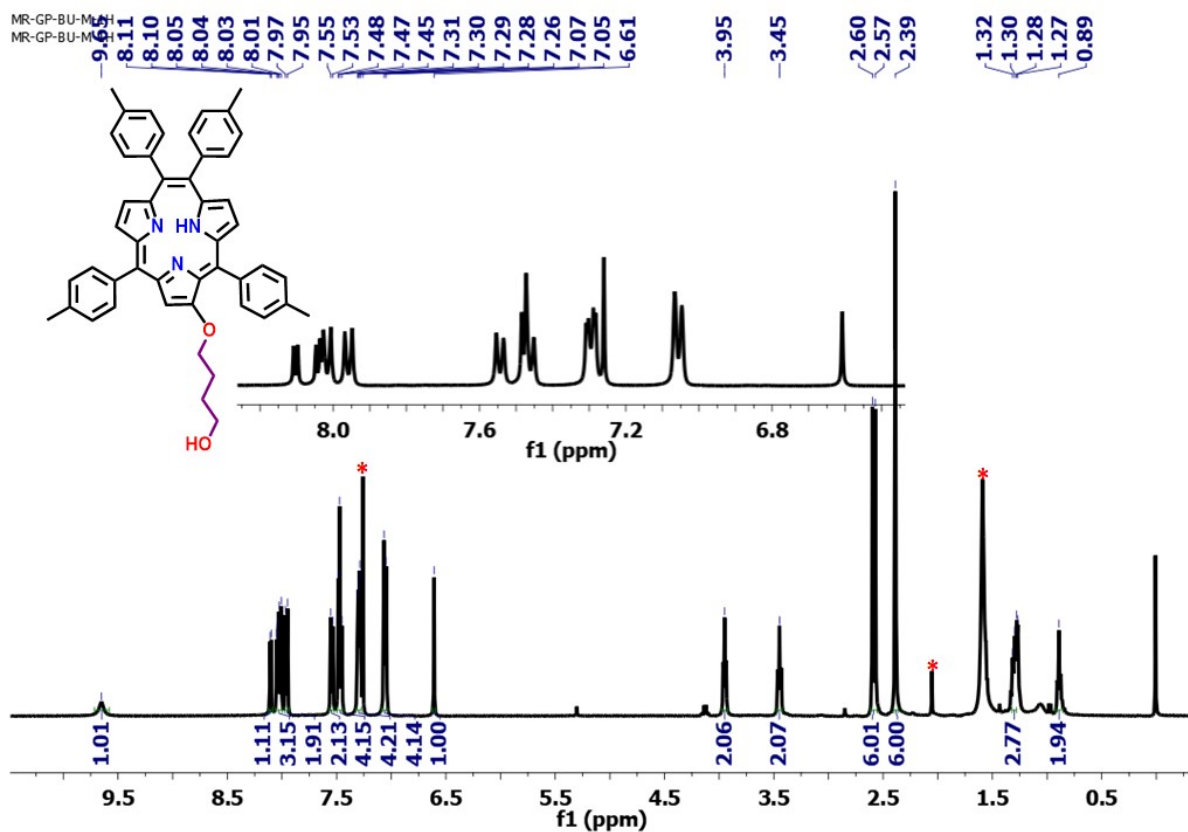

**Figure S16.**  $^1\text{H}$  NMR spectrum of the compound  $2\text{-O}(\text{CH}_2)_4\text{-OH}$  recorded in  $\text{CDCl}_3$  on 400 MHz FT-NMR spectrometer. Note: Peaks marked with asterisk (\*) are due to residual solvents.

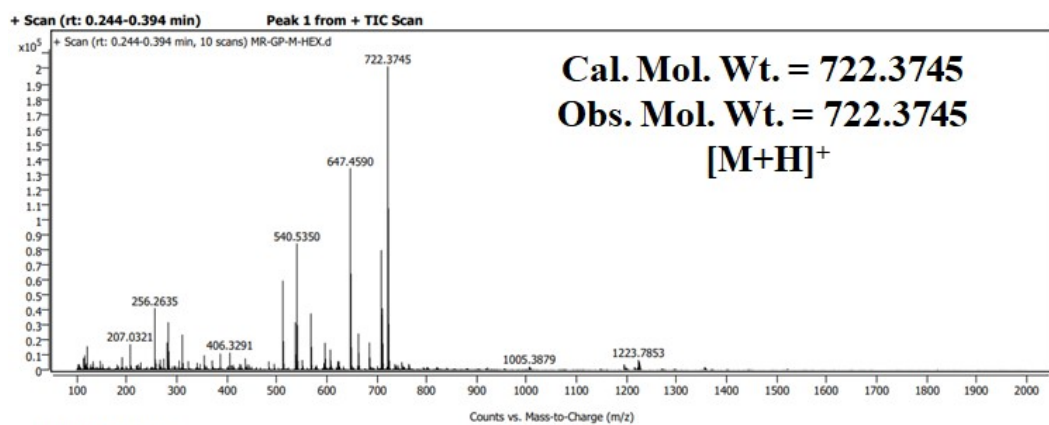

Compound Details

Cpd. 1: C<sub>50</sub>H<sub>47</sub>N<sub>3</sub>O<sub>2</sub>

| Formula                                                       | m/z      | Observed M/Z     | Difference Da     | Difference PPM    | Score |
|---------------------------------------------------------------|----------|------------------|-------------------|-------------------|-------|
| C <sub>50</sub> H <sub>47</sub> N <sub>3</sub> O <sub>2</sub> | 722.3745 | 722.374543275351 | 0.326483451090098 | 0.452590053386762 | 99.34 |

Compound Spectra (Zoomed)

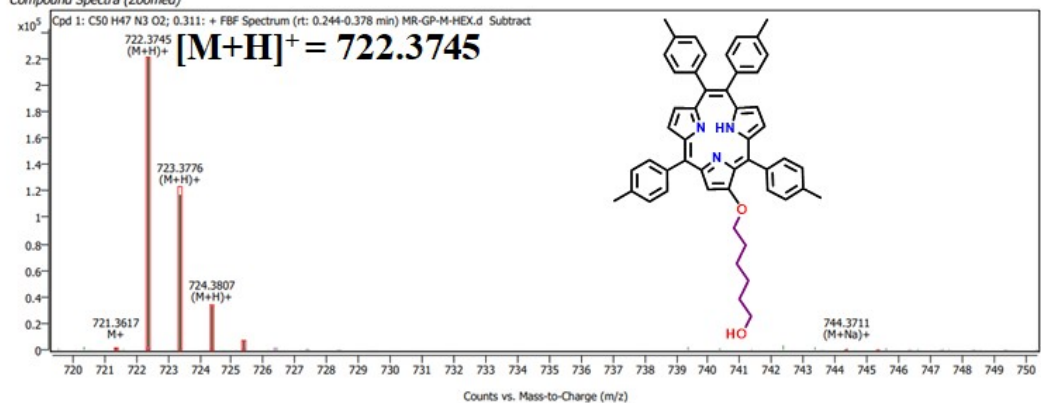

Figure S17. HR mass spectrum of the compound 2-O(CH<sub>2</sub>)<sub>6</sub>-OH.

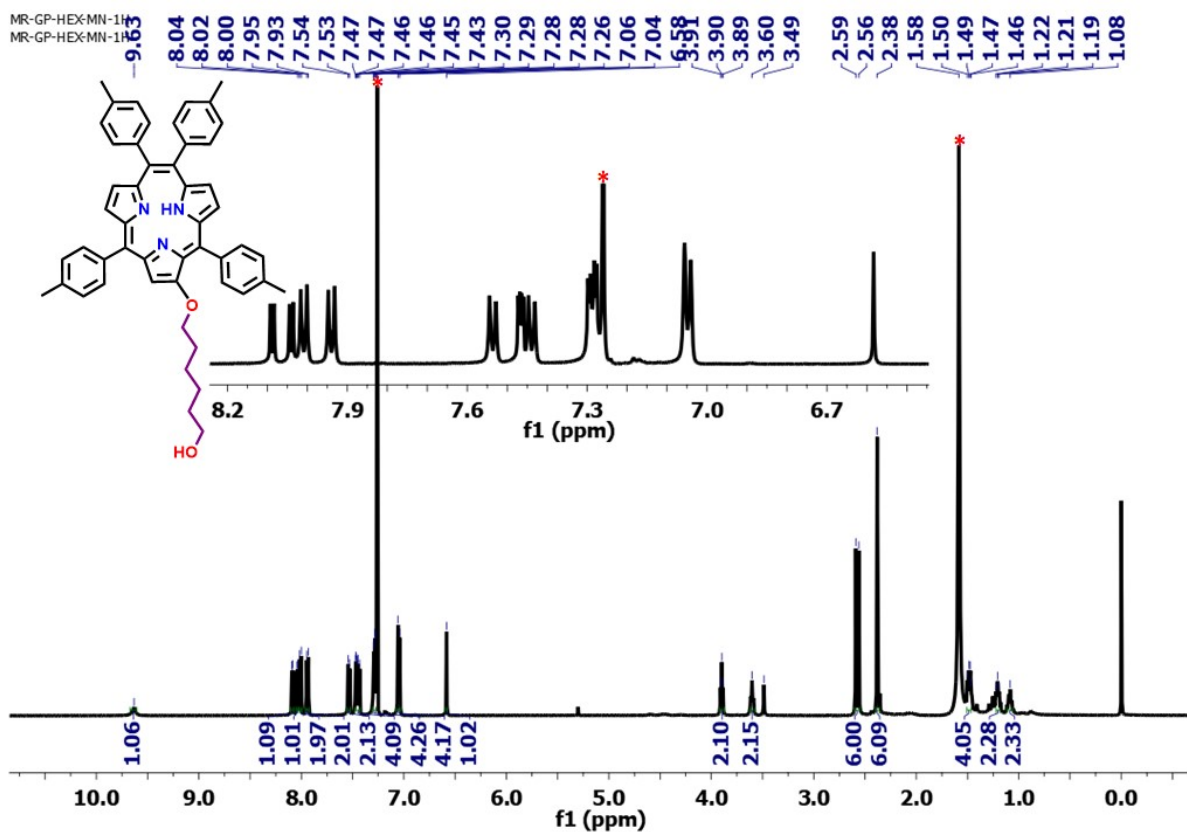

**Figure S18.**  $^1\text{H}$  NMR spectrum of the compound  $2\text{-O}(\text{CH}_2)_6\text{-OH}$  recorded in  $\text{CDCl}_3$  on 400 MHz FT-NMR spectrometer. Note: Peaks marked with asterisk (\*) are due to residual solvents.

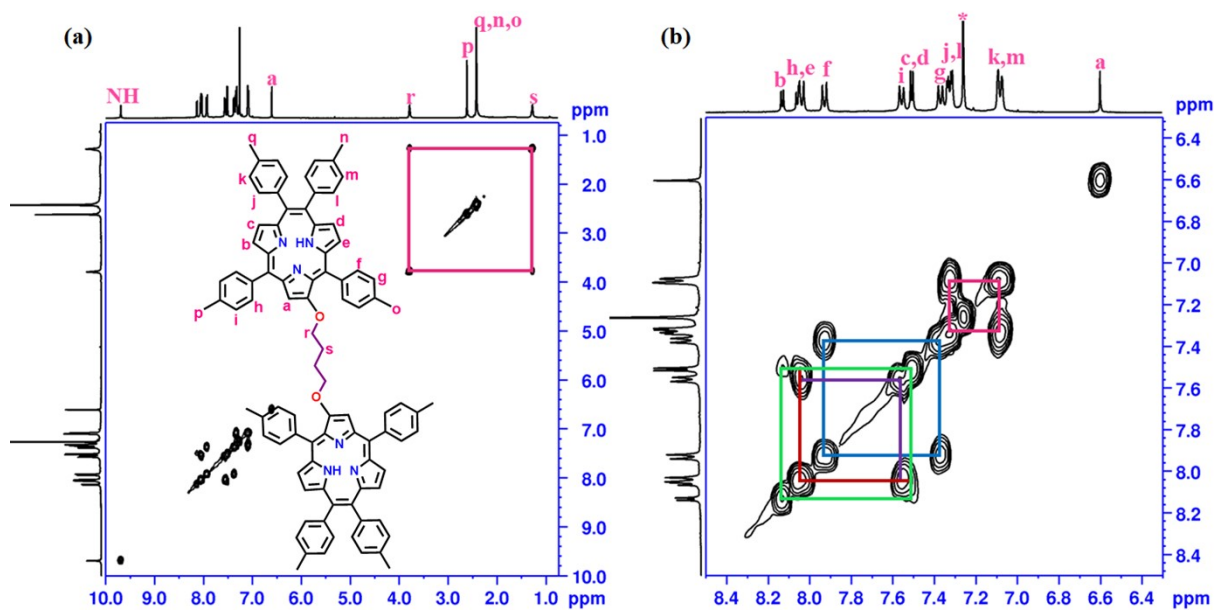

**Figure S19.** (a)  $^1\text{H}$ - $^1\text{H}$  COSY spectra of (a) **4** in full range, (b) **4** in selected region recorded in  $\text{CDCl}_3$  at room temperature ( $25\text{ }^\circ\text{C}$ ).

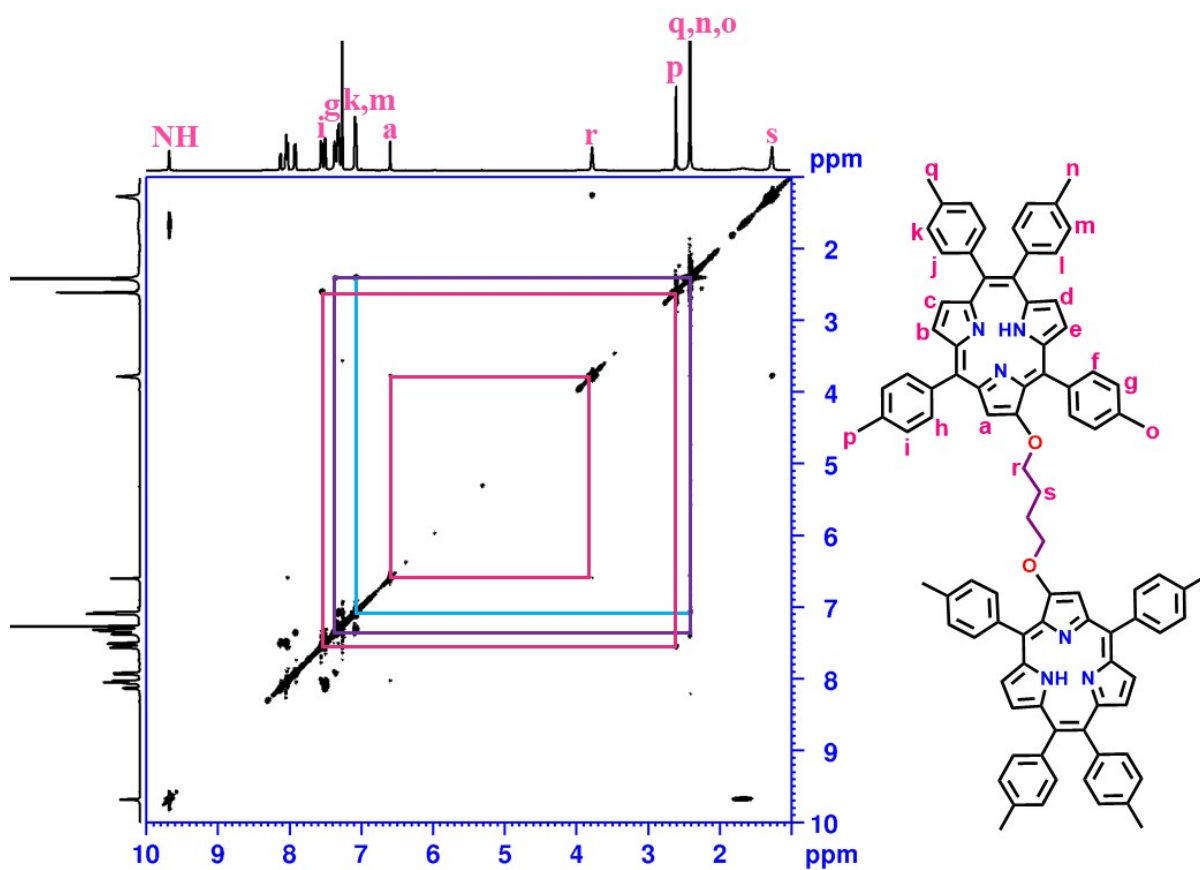

**Figure S20.**  $^1\text{H}$ - $^1\text{H}$  NOESY spectrum (full range) of compound **4** recorded in  $\text{CDCl}_3$  at room temperature ( $25\text{ }^\circ\text{C}$ ).

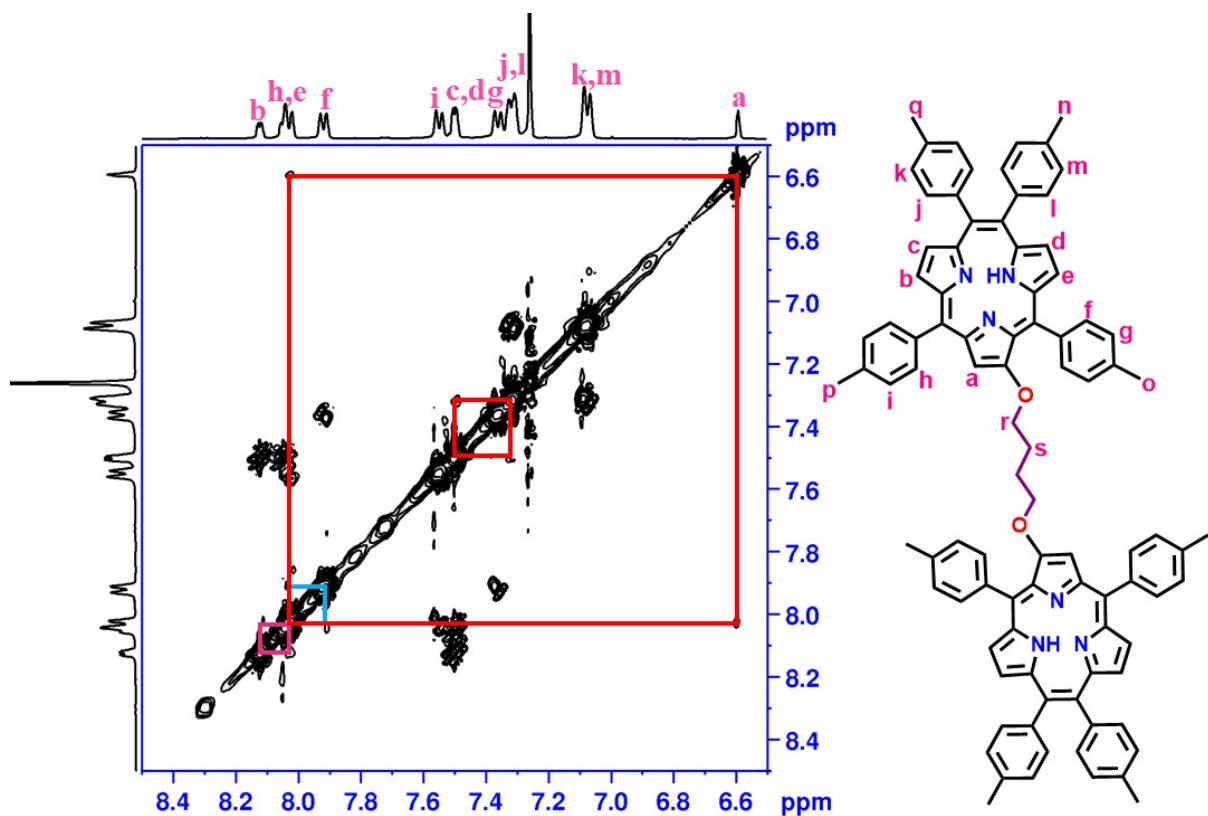

**Figure S21.**  $^1\text{H}$ - $^1\text{H}$  NOESY spectrum (selected region) of compound **4** recorded in  $\text{CDCl}_3$  at room temperature (25  $^\circ\text{C}$ ).

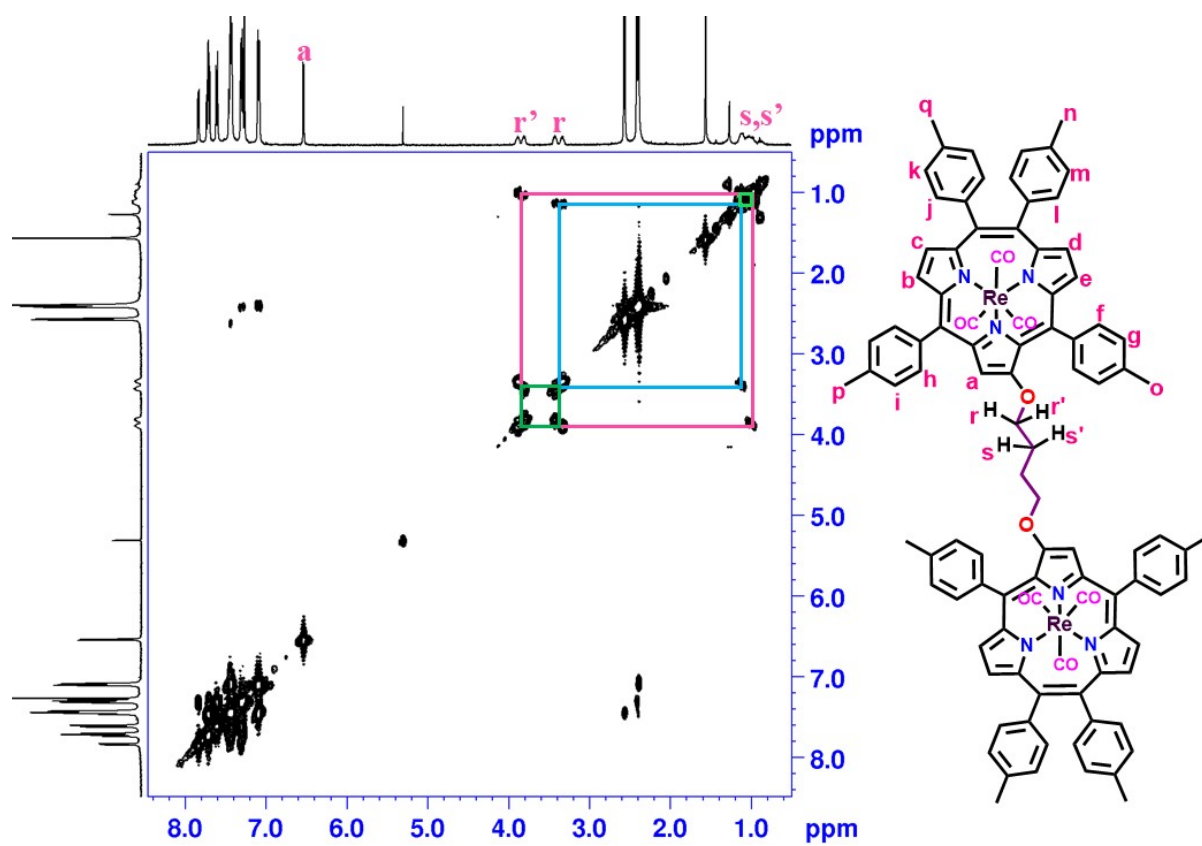

**Figure S22.**  $^1\text{H}$ - $^1\text{H}$  COSY spectrum (full range) of compound **4-Re** recorded in  $\text{CDCl}_3$  at room temperature ( $25\text{ }^\circ\text{C}$ ).

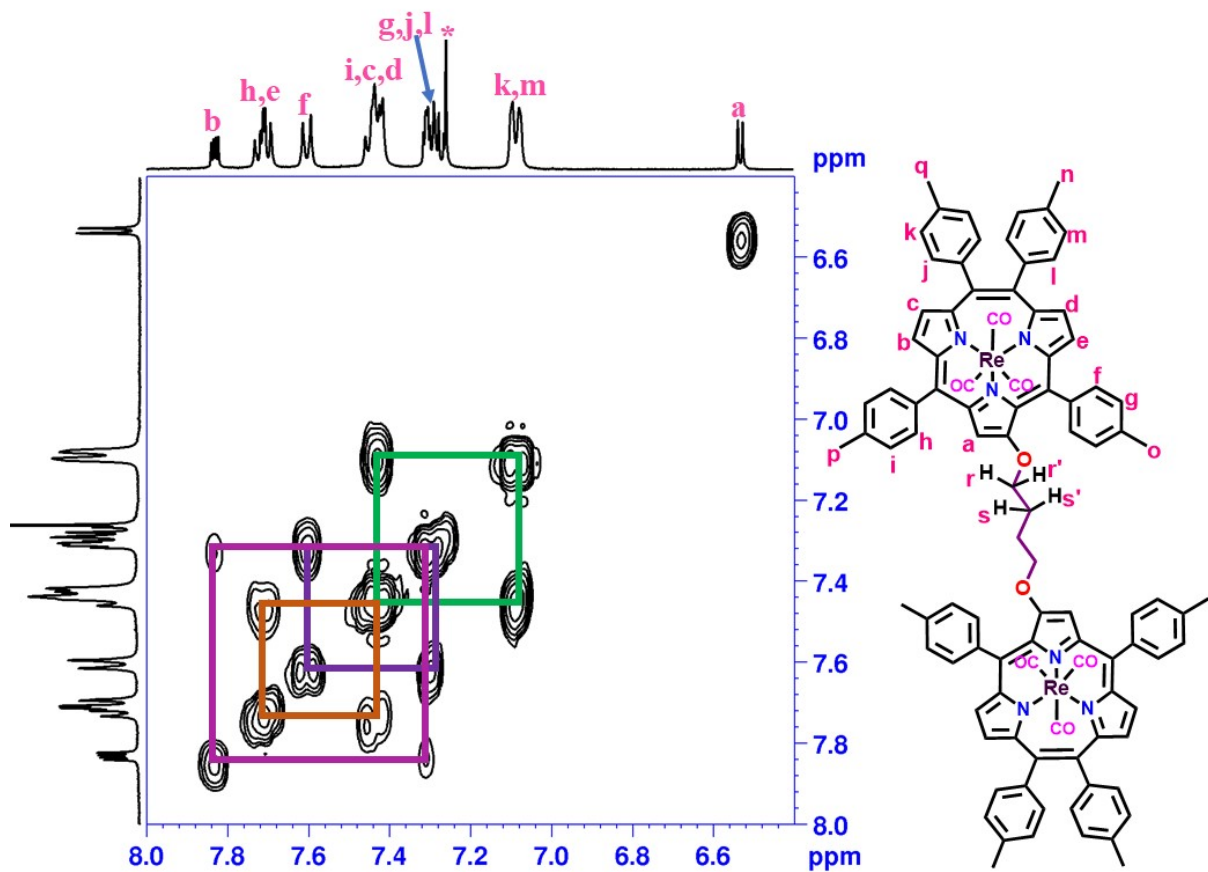

**Figure S23.**  $^1\text{H}$ - $^1\text{H}$  COSY spectrum (selected region) of compound **4-Re** recorded in  $\text{CDCl}_3$  at room temperature ( $25\text{ }^\circ\text{C}$ ).

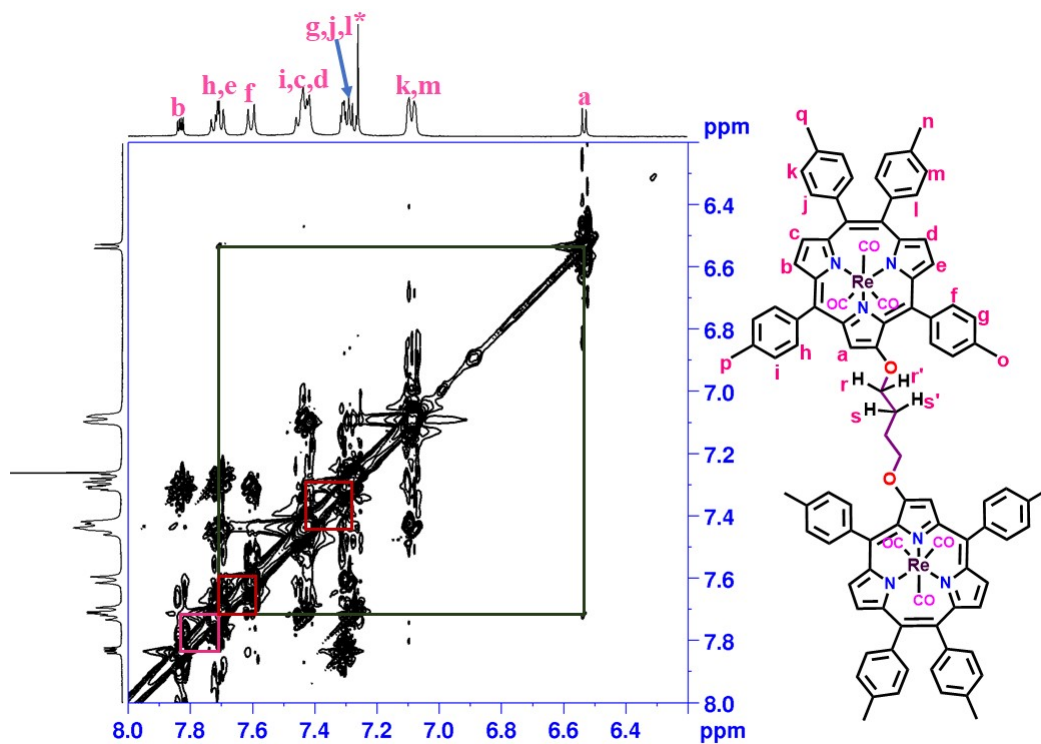

**Figure S24.**  $^1\text{H}$ - $^1\text{H}$  NOESY spectrum (selected region) of compound **4-Re** recorded in  $\text{CDCl}_3$  at room temperature ( $25\text{ }^\circ\text{C}$ ).

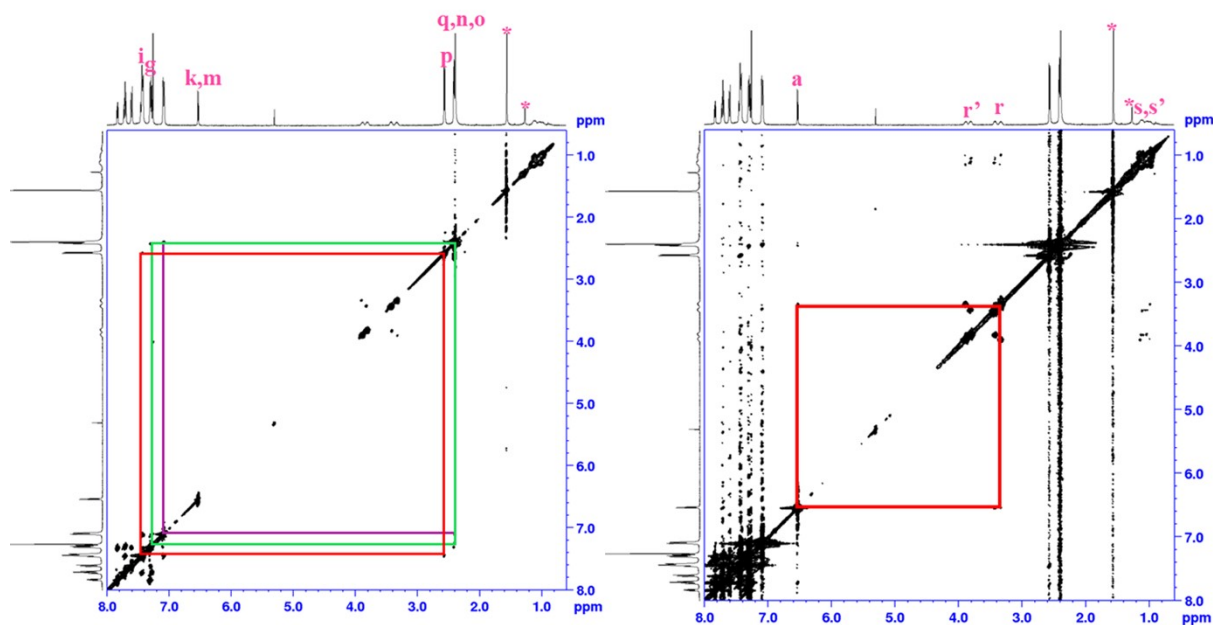

**Figure S25.**  $^1\text{H}$ - $^1\text{H}$  NOESY spectra (full range) of compound **4-Re** recorded in  $\text{CDCl}_3$  at room temperature ( $25\text{ }^\circ\text{C}$ ).



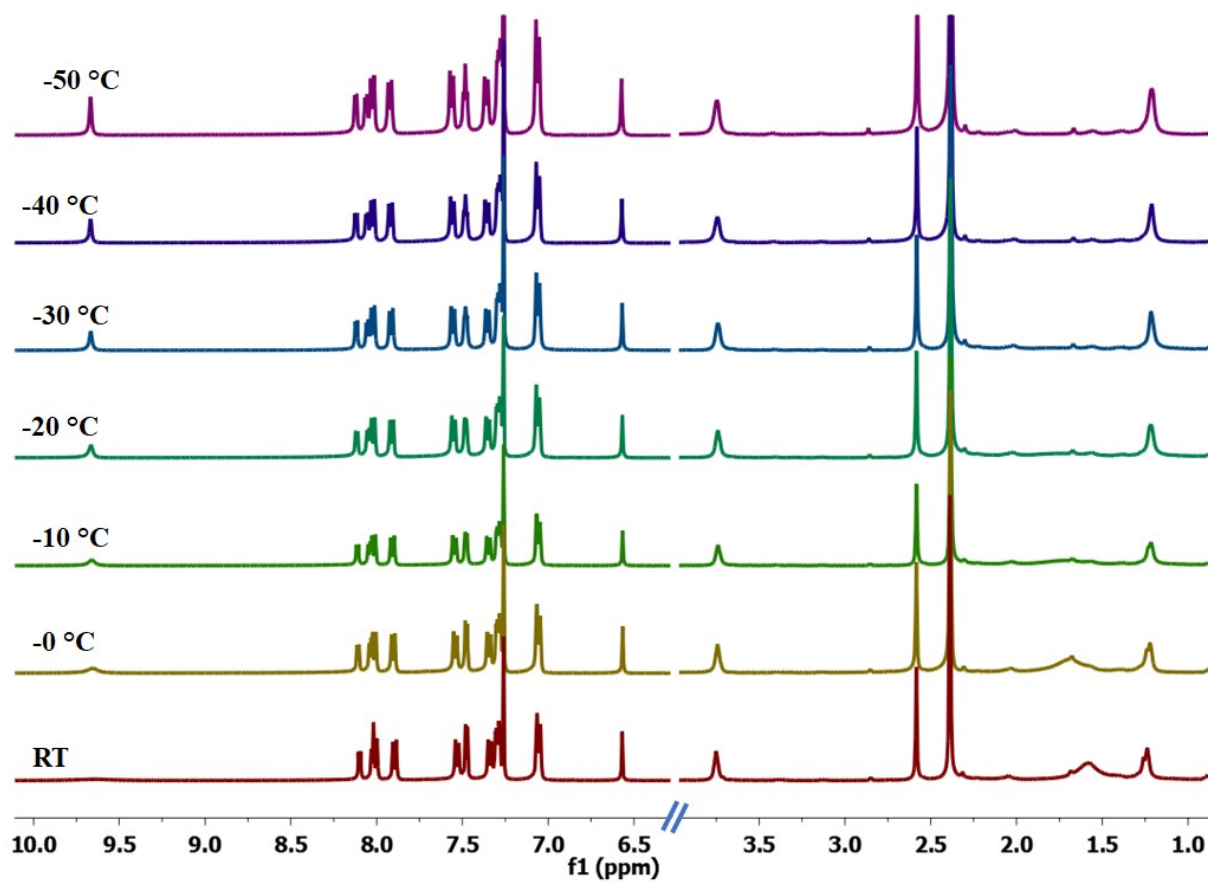

**Figure S26.** <sup>1</sup>H-NMR spectra of compound **4** recorded in CDCl<sub>3</sub> at variable low temperature.

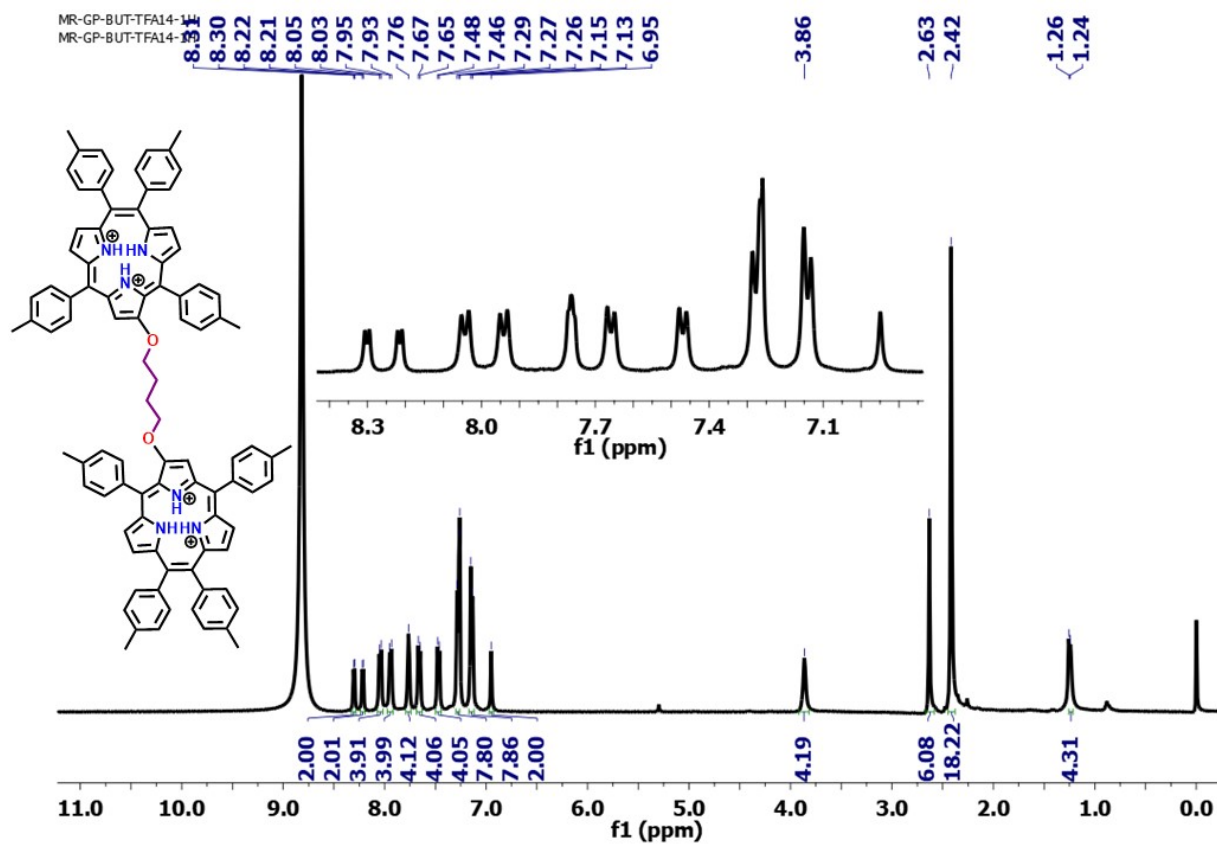

Figure S27.  $^1\text{H-NMR}$  spectrum of  $4.4\text{H}^+$  recorded in  $\text{CDCl}_3$  at room temperature ( $25\text{ }^\circ\text{C}$ ).

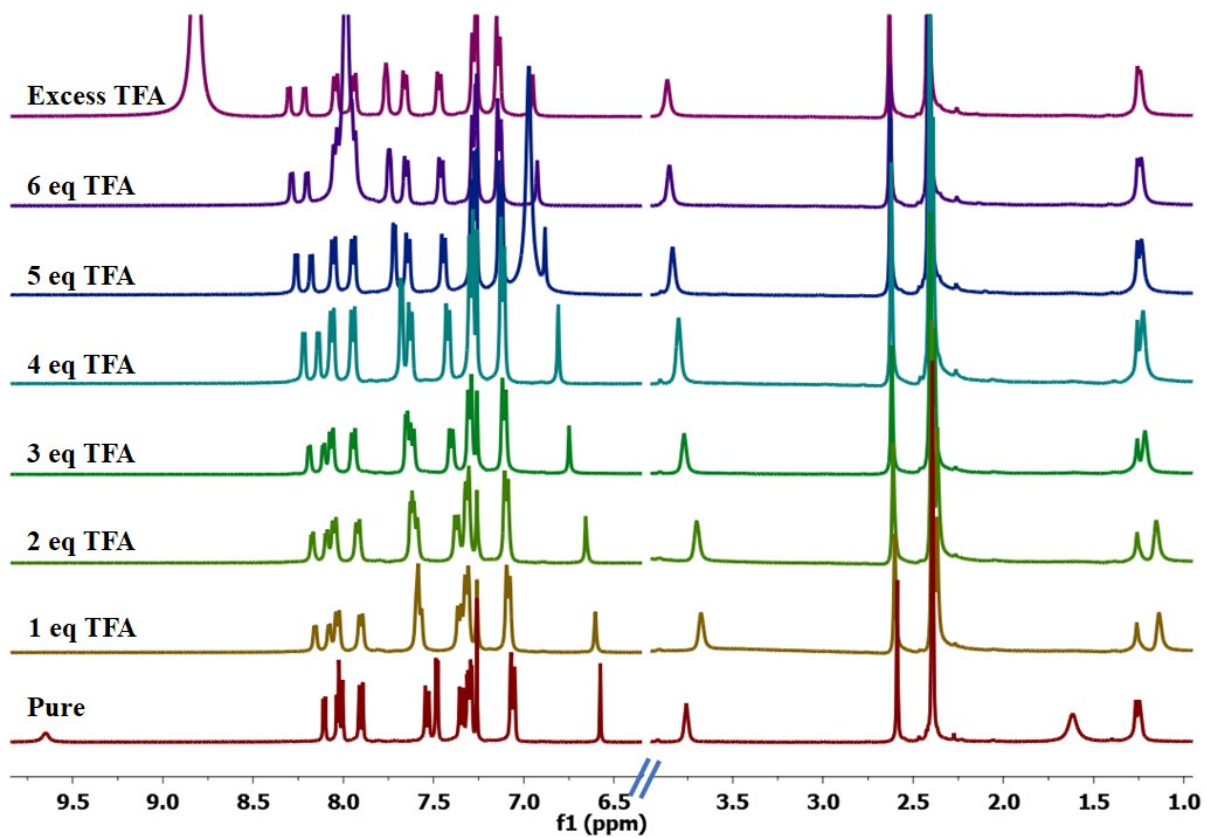

**Figure S28.** <sup>1</sup>H NMR titration experiment of the compound **4** with dilute solution of TFA recorded in CDCl<sub>3</sub> at room temperature (25 °C).

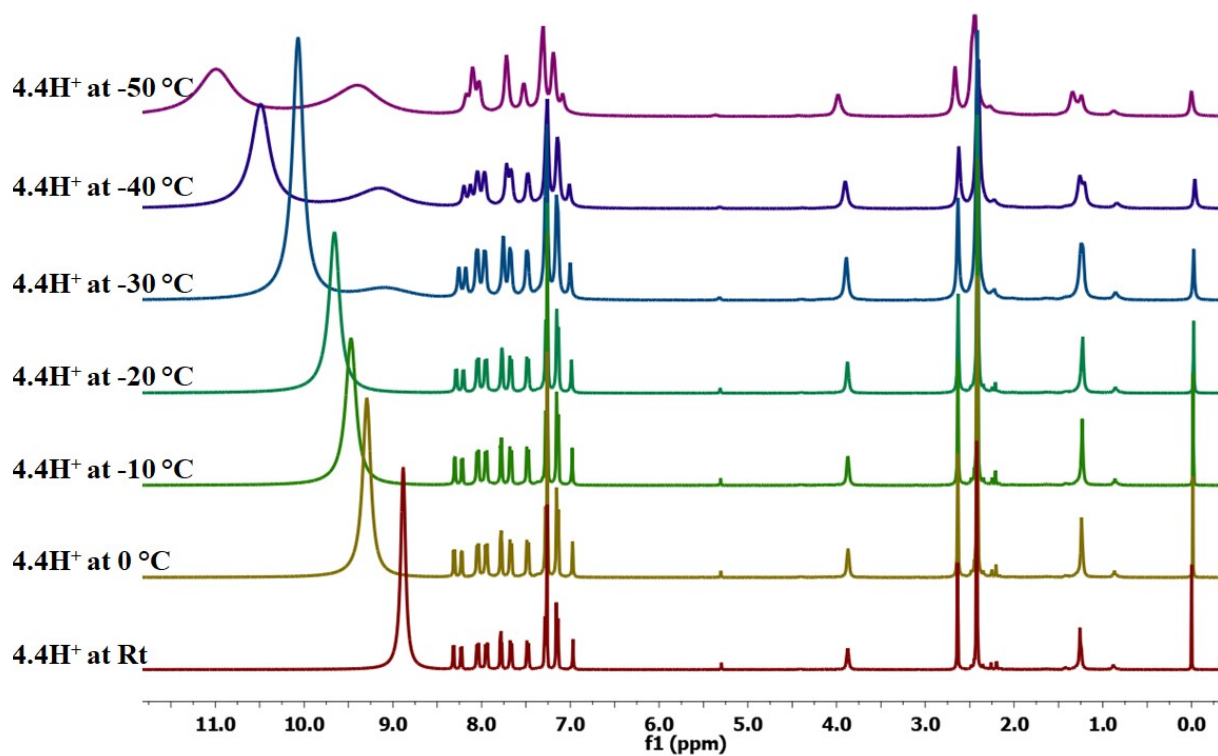

**Figure S29.** <sup>1</sup>H-NMR spectrum of 4.4H<sup>+</sup> recorded in CDCl<sub>3</sub> at variable low temperature.

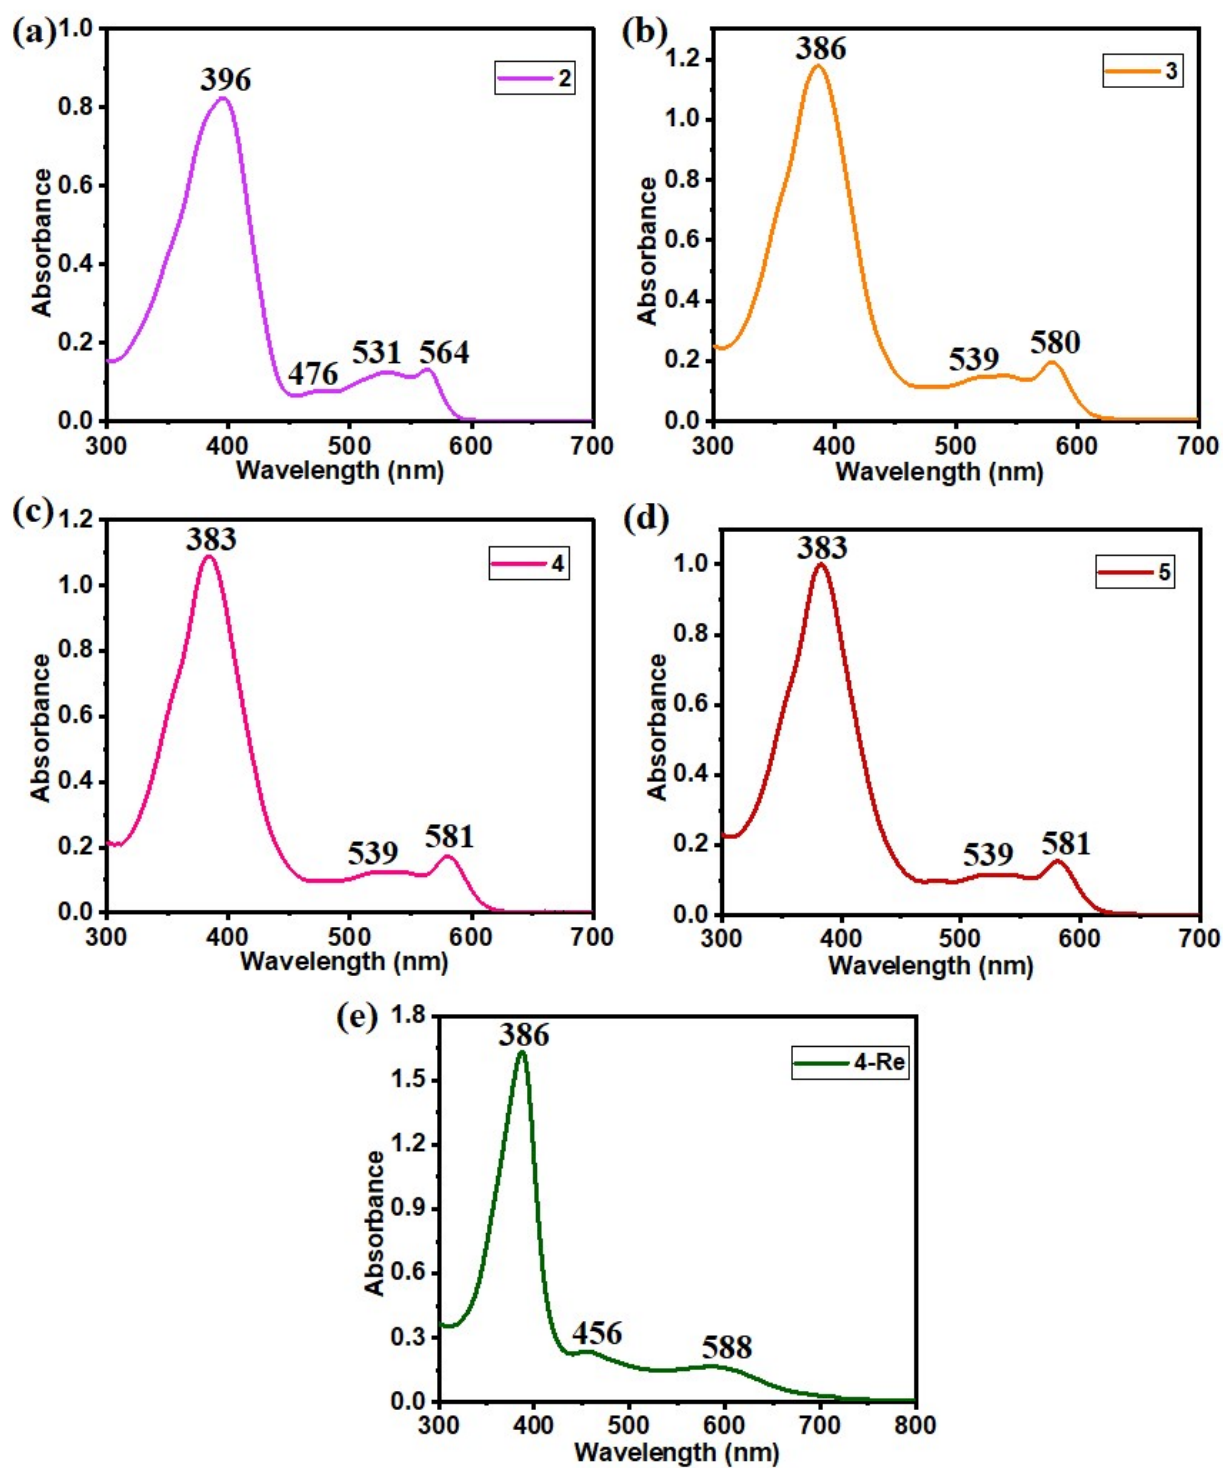

**Figure S30.** Absorption spectra of compounds 2-5 and 4-Re ( $1 \times 10^{-5} \text{ M}$ ) recorded in  $\text{CHCl}_3$ .

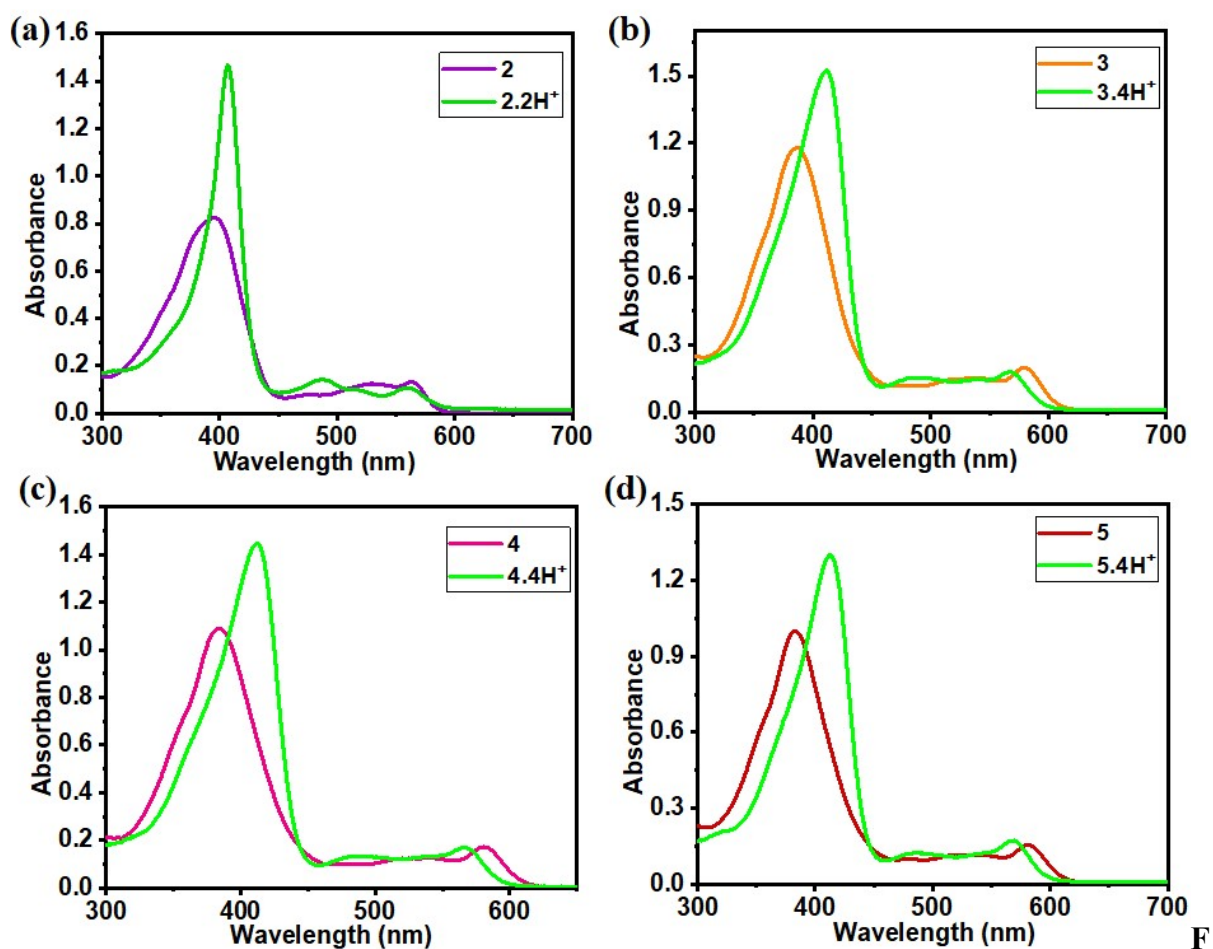

**figure S31.** Comparison of the absorption spectra of compounds 2-5 and 2.2H<sup>+</sup>, 3.4H<sup>+</sup>-5.4H<sup>+</sup> respectively in chloroform.

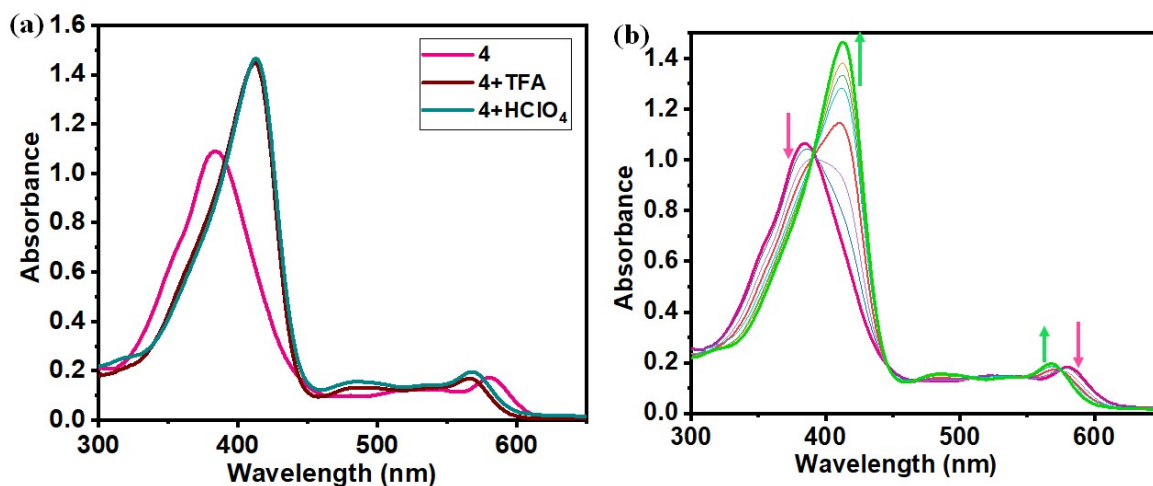

**Figure S32.** (a) Comparison of absorption spectra of compound **4** and in the presence of an excess of two different acids in  $\text{CHCl}_3$ ; (b) Systematic protonation studies of compound **4** ( $1 \times 10^{-5}$  M) by addition of increasing amounts of  $\text{HClO}_4$  in  $\text{CHCl}_3$  at room temperature.

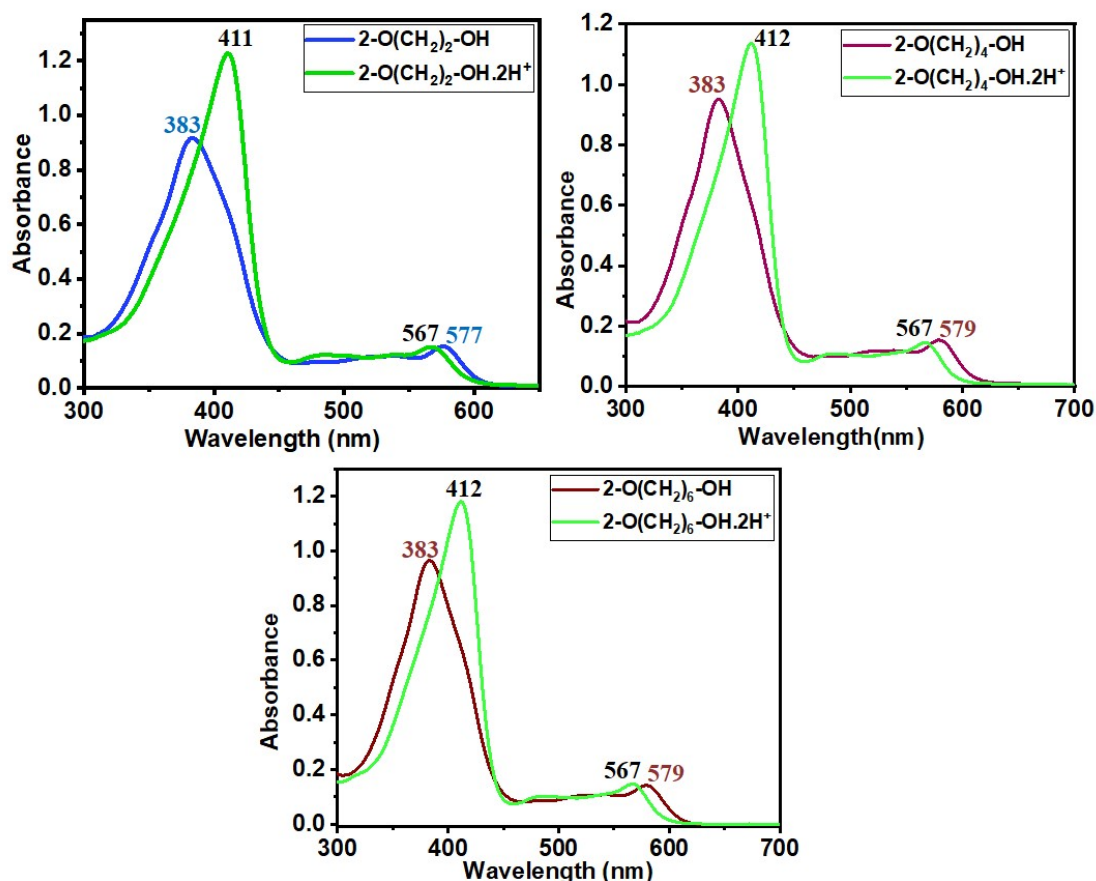

**Figure S33.** Comparison of the absorption spectra of compounds  $2\text{-O}(\text{CH}_2)_n\text{-OH}$  and their protonated derivatives respectively in chloroform.

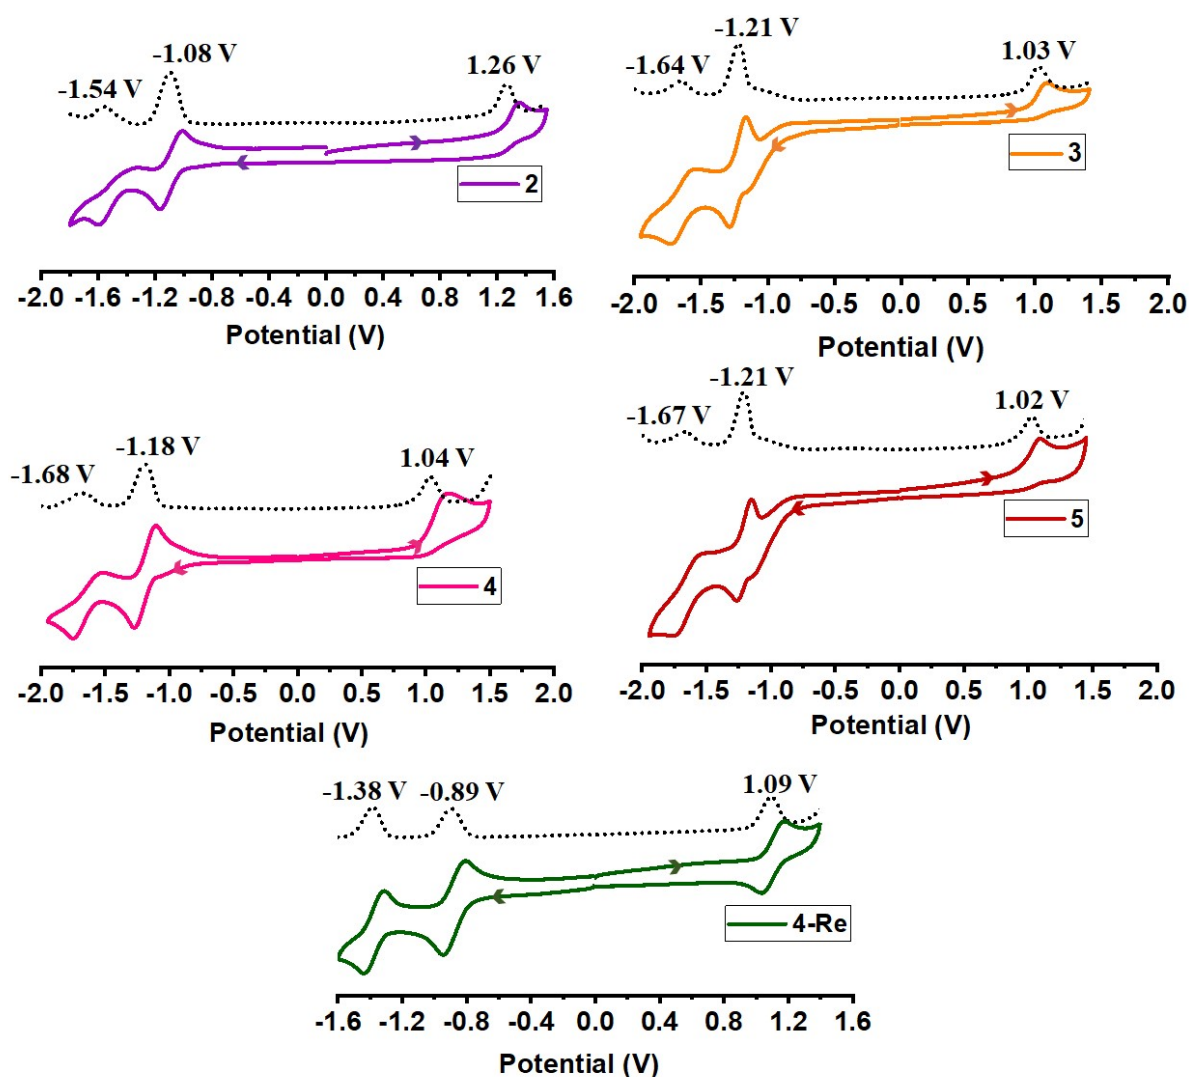

**Figure S34.** Comparison of cyclic voltammograms (coloured solid line) with their differential pulse voltammogram (dotted black line) of compounds **2-5** and **4-Re** recorded in dry  $\text{CH}_2\text{Cl}_2$  with 0.1 M TBAP as the supporting electrolyte and a saturated calomel electrode (SCE) as the reference electrode at a scan rate of  $50 \text{ mV s}^{-1}$ . A saturated calomel electrode (SCE) was employed as the reference electrode, glassy carbon as the working electrode, and platinum wire as the auxiliary electrode. (Note that polarographic convention has been followed for plotting CV starting at 0 V). All the potentials were calibrated by using ferrocene as an external standard, taking  $E_{1/2}(\text{Fc}/\text{Fc}^+) = 0.42 \text{ V versus SCE}$ .



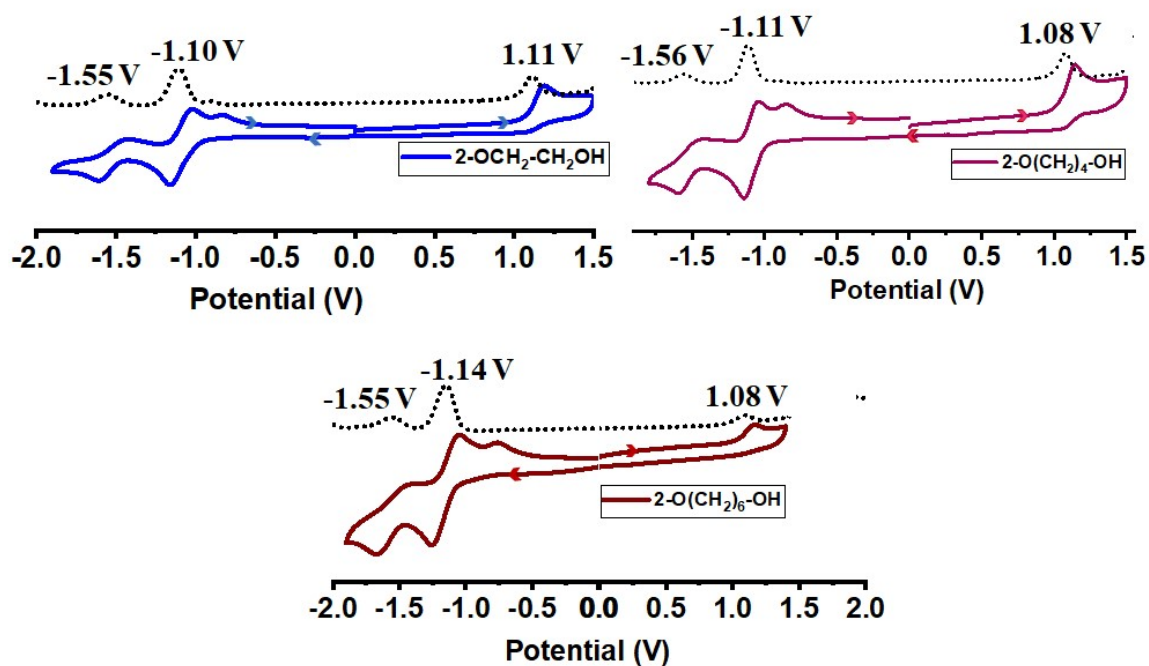

**Figure S35.** Comparison of cyclic voltammograms (coloured solid line) with their differential pulse voltammogram (dotted black line) of compounds  $2\text{-O}(\text{CH}_2)_n\text{-OH}$  recorded in dry  $\text{CH}_2\text{Cl}_2$  with 0.1 M TBAP as the supporting electrolyte and a saturated calomel electrode (SCE) as the reference electrode at a scan rate of  $50 \text{ mV s}^{-1}$ . A saturated calomel electrode (SCE) was employed as the reference electrode, glassy carbon as the working electrode, and platinum wire as the auxiliary electrode. (Note that polarographic convention has been followed for plotting CV starting at 0 V). All the potentials were calibrated by using ferrocene as an external standard, taking  $E_{1/2}(\text{Fc}/\text{Fc}^+) = 0.42 \text{ V versus SCE}$ .

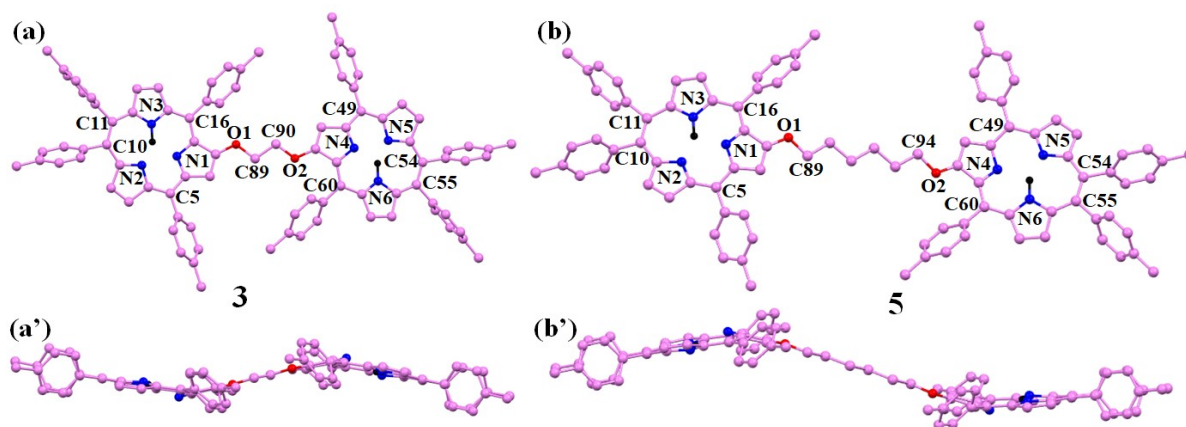

**Figure S36.** Ground state optimized structures with top view and side view of compounds **3** (a and a') and **5** (b and b') at B3LYP/6-31G (d, p) level of theory. Hydrogen atoms except inner NH were omitted for clarity.

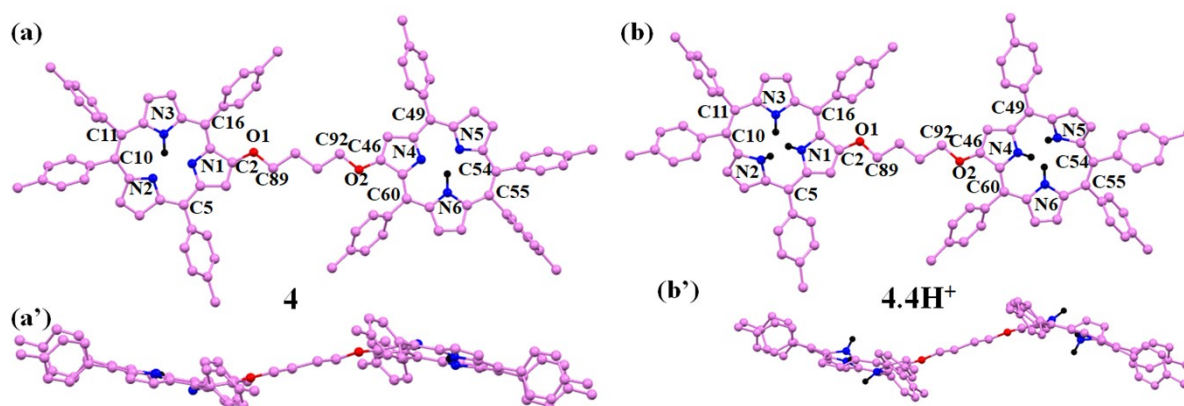

**Figure S37.** Ground state optimized structures with top view and side view of compounds **4** (a and a') and **4.4H<sup>+</sup>** (b and b') at B3LYP/6-31G (d, p) level of theory. Hydrogen atoms except inner NH were omitted for clarity.

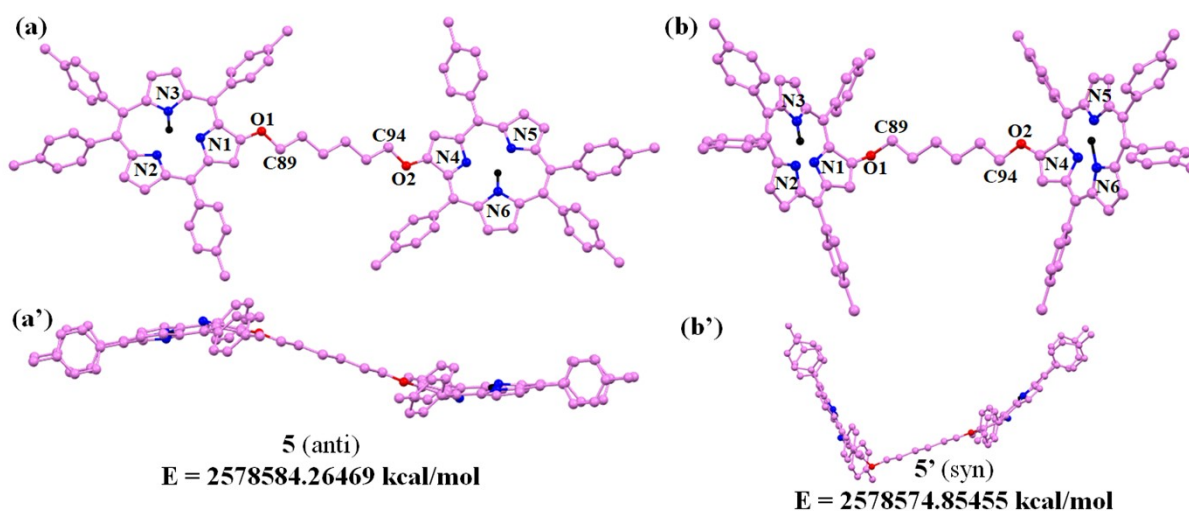

**Figure S38.** Ground state optimized structures with top view and side view of compounds **5** (a and a') in *anti*-conformation and **5'** (b and b') in *syn*-conformation at B3LYP/6-31G (d, p) level of theory. Hydrogen atoms except inner NH were omitted for clarity.

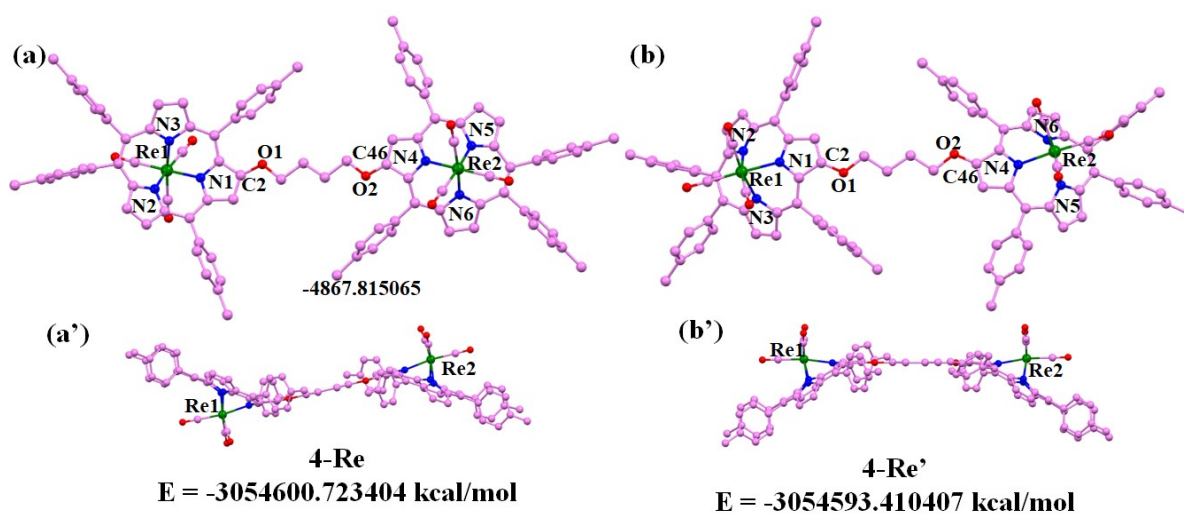

**Figure S39.** Ground state optimized structures with top view and side view of compounds **4-Re** (a and a') and **4-Re'** (b and b') at B3LYP/6-31G (d, p) and LANL2DZ level of theory. Hydrogen atoms except inner NH were omitted for clarity.

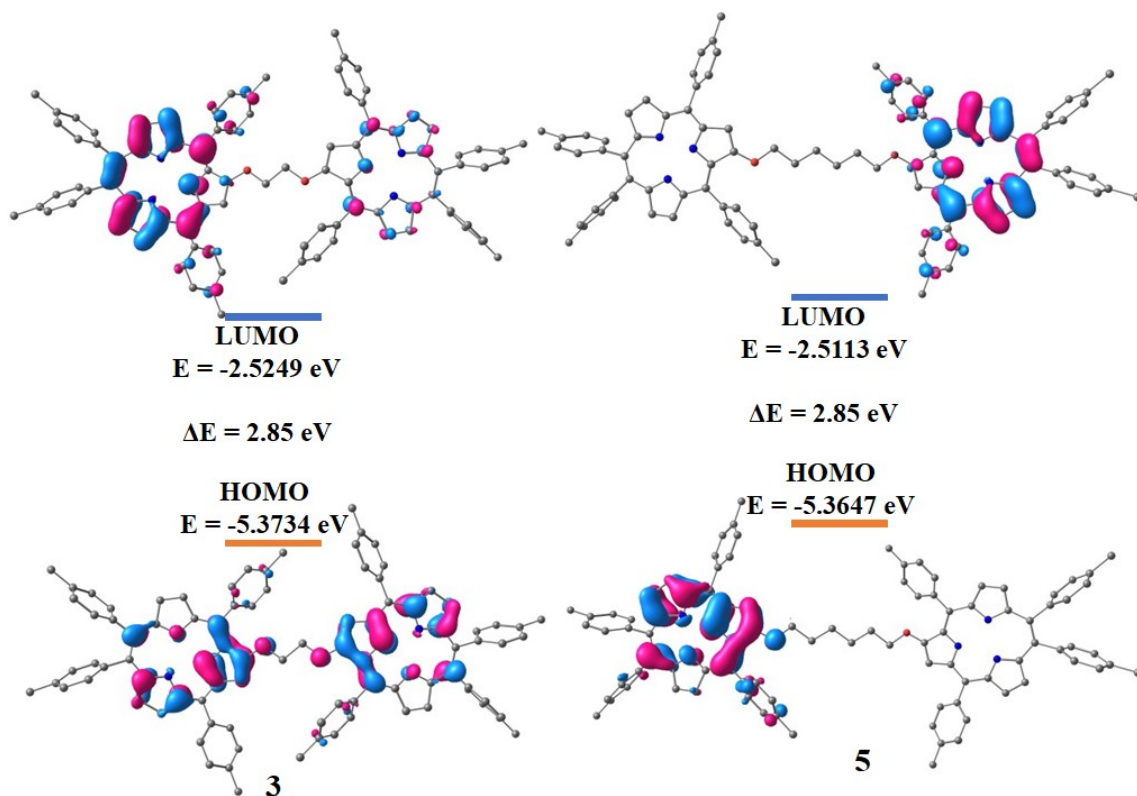

**Figure S40.** Energy-level diagram (selected FMOs) of compounds **3** and **5** calculated by the B3LYP/6-31g(d, p) method.

**Table S1.**  $S_0$  optimized geometry of the compound **3** at B3LYP/6-31g (d,p) level of theory.

# Sum of imaginary frequencies= 0

# Total Energy (hartree) = -3951.966766

| Atom | X        | Y        | Z        | Atom | X        | Y        | Z        |
|------|----------|----------|----------|------|----------|----------|----------|
| N    | -7.35269 | -1.39906 | -0.25128 | C    | 12.7218  | 1.740834 | -1.68302 |
| N    | -5.05869 | -0.54866 | -1.12564 | H    | 12.98628 | 2.2049   | -2.63018 |
| N    | -6.87924 | 1.121851 | -0.45474 | C    | 9.301613 | -1.0552  | 0.034772 |
| H    | -6.76685 | 0.066701 | -0.41822 | C    | 3.169998 | 1.736069 | 0.670092 |
| C    | -7.90772 | -3.59404 | -0.63166 | H    | 2.509193 | 2.544309 | 0.39594  |
| H    | -7.79956 | -4.64462 | -0.86196 | C    | 4.135342 | -0.30282 | 1.07737  |
| C    | -8.69087 | -1.50018 | -0.2521  | C    | 11.40471 | 1.337931 | -1.46246 |
| C    | -3.11469 | -1.63344 | -0.53921 | H    | 10.6568  | 1.495173 | -2.23443 |
| H    | -2.44487 | -2.4313  | -0.25686 | C    | 3.420912 | -3.76451 | 0.072487 |
| C    | -6.81935 | -2.6312  | -0.50076 | H    | 4.131106 | -3.75944 | -0.74806 |

|   |          |          |          |   |          |          |          |
|---|----------|----------|----------|---|----------|----------|----------|
| C | -4.54201 | -1.74957 | -0.82681 | C | 4.498194 | -1.67168 | 0.981656 |
| C | -11.0336 | -0.83348 | 0.072114 | C | 8.721599 | 1.456327 | 0.153962 |
| C | -9.33895 | 0.993586 | -0.10667 | C | 9.144748 | 2.845444 | 0.342649 |
| C | -8.09892 | 1.694273 | -0.31466 | H | 10.16362 | 3.20366  | 0.358715 |
| C | -4.11364 | 0.390725 | -0.93917 | C | 2.450568 | -4.76143 | 0.141735 |
| C | -9.06956 | -2.89471 | -0.49031 | H | 2.425691 | -5.53433 | -0.62262 |
| H | -10.0771 | -3.27726 | -0.56153 | C | 9.59725  | 0.323486 | -0.02338 |
| C | -7.89655 | 3.117878 | -0.43441 | C | 1.562138 | -3.76552 | 2.137117 |
| H | -8.67086 | 3.865944 | -0.3666  | H | 0.846521 | -3.76425 | 2.955635 |
| C | -5.89771 | 2.056358 | -0.67237 | C | 8.008093 | 3.576963 | 0.521169 |
| C | -2.84443 | -0.28966 | -0.60868 | H | 7.936478 | 4.634716 | 0.732097 |
| C | -10.5009 | 1.930208 | 0.112039 | C | 6.891575 | 2.639655 | 0.461539 |
| C | -4.87794 | -4.23028 | -0.59687 | C | 11.92591 | -3.16847 | -1.75311 |
| C | -5.4267  | -2.85946 | -0.65906 | H | 12.2782  | -3.32026 | -2.77068 |
| C | -4.5154  | 1.74768  | -0.8302  | C | 13.70726 | 1.560087 | -0.70579 |
| C | -9.60212 | -0.39316 | -0.09065 | C | 4.996005 | 4.289306 | 0.606074 |
| C | -11.982  | -0.64577 | -0.94323 | C | 12.01573 | 0.544653 | 0.721004 |
| H | -11.6893 | -0.14197 | -1.85881 | H | 11.74908 | 0.07997  | 1.664875 |
| C | -2.52673 | 2.917128 | -1.80867 | C | 5.513239 | 2.906709 | 0.67464  |
| H | -2.5014  | 2.160305 | -2.58611 | C | 13.3279  | 0.956224 | 0.500626 |
| C | -12.6479 | 3.737702 | 0.545055 | H | 14.07123 | 0.805598 | 1.279936 |
| C | -6.55795 | 3.334045 | -0.66306 | C | 1.502349 | -4.78169 | 1.172789 |
| H | -6.07339 | 4.28558  | -0.82442 | C | 12.02545 | -3.67626 | 0.588349 |
| C | -3.5375  | 3.846491 | 0.168825 | H | 12.45843 | -4.2252  | 1.421144 |
| H | -4.28036 | 3.802091 | 0.958672 | C | 5.433779 | 5.194846 | -0.37837 |
| C | -12.7544 | -1.94457 | 1.386095 | H | 6.155924 | 4.864705 | -1.11776 |
| H | -13.045  | -2.44915 | 2.304388 | C | 11.0029  | -2.75874 | 0.8314   |
| C | -3.522   | 2.846965 | -0.81836 | H | 10.64819 | -2.60435 | 1.846588 |
| C | -1.5958  | 3.950107 | -1.81528 | C | 4.021938 | 4.738067 | 1.517967 |
| H | -0.84712 | 3.988678 | -2.60285 | H | 3.674186 | 4.063638 | 2.293887 |
| C | -11.0519 | 2.104055 | 1.388956 | C | 3.96499  | 6.93808  | 0.476915 |
| H | -10.6515 | 1.535515 | 2.222811 | C | 3.520091 | 6.034704 | 1.452554 |
| C | -12.0947 | 3.564918 | -0.72901 | H | 2.776921 | 6.355575 | 2.178575 |
| H | -12.4974 | 4.127414 | -1.56795 | C | 4.927037 | 6.490085 | -0.4381  |
| C | -2.59609 | 4.873864 | 0.161829 | H | 5.276639 | 7.162958 | -1.21728 |
| H | -2.62628 | 5.629681 | 0.942777 | O | -1.69467 | 0.379452 | -0.37372 |
| C | -13.7028 | -1.75478 | 0.374866 | O | 1.701807 | -0.24817 | 0.591156 |
| C | -13.2902 | -1.09871 | -0.79305 | C | 13.5926  | -4.91268 | -0.97642 |
| H | -14.0042 | -0.94014 | -1.59781 | H | 14.15833 | -5.14271 | -0.06904 |
| C | -5.33407 | -5.16696 | 0.349586 | H | 13.17492 | -5.85615 | -1.34975 |
| H | -6.09541 | -4.87026 | 1.063418 | H | 14.29794 | -4.55216 | -1.73206 |
| C | -11.4406 | -1.50005 | 1.235582 | C | 15.12688 | 2.024653 | -0.92988 |
| H | -10.721  | -1.66644 | 2.032169 | H | 15.35654 | 2.109195 | -1.99602 |
| C | -11.0374 | 2.680424 | -0.94284 | H | 15.2995  | 3.010386 | -0.47962 |
| H | -10.6261 | 2.564527 | -1.94169 | H | 15.84944 | 1.33529  | -0.48179 |
| C | -1.60829 | 4.946466 | -0.82783 | C | 3.44449  | 8.35435  | 0.43086  |
| C | -4.79739 | -6.4501  | 0.405442 | H | 4.043223 | 9.016178 | 1.069386 |
| H | -5.16253 | -7.14756 | 1.155364 | H | 3.481923 | 8.762276 | -0.58353 |

|   |          |          |          |   |          |          |          |
|---|----------|----------|----------|---|----------|----------|----------|
| C | -3.85505 | -4.63558 | -1.47472 | H | 2.410474 | 8.414032 | 0.783562 |
| H | -3.49201 | -3.93675 | -2.22145 | C | 0.433231 | -5.84649 | 1.227571 |
| C | -12.1065 | 2.989636 | 1.598912 | H | -0.44967 | -5.55612 | 0.643758 |
| H | -12.5163 | 3.101967 | 2.599915 | H | 0.793399 | -6.796   | 0.819698 |
| C | -3.32326 | -5.92066 | -1.41343 | H | 0.097741 | -6.0235  | 2.253652 |
| H | -2.54217 | -6.20788 | -2.11322 | C | -3.23244 | -8.25881 | -0.43539 |
| C | -3.78586 | -6.85492 | -0.47604 | H | -3.26939 | -8.67504 | 0.575769 |
| N | 5.108846 | 0.616538 | 1.209295 | H | -3.81009 | -8.92995 | -1.08354 |
| N | 7.382654 | 1.389163 | 0.216319 | H | -2.19432 | -8.29134 | -0.77908 |
| N | 6.857269 | -1.11405 | 0.491471 | C | -0.57264 | 6.045217 | -0.82017 |
| H | 6.769872 | -0.05697 | 0.437295 | H | -0.92501 | 6.921826 | -0.26873 |
| C | 6.492135 | -3.31274 | 0.762958 | H | 0.359408 | 5.712369 | -0.34583 |
| H | 5.992193 | -4.24814 | 0.966315 | H | -0.31944 | 6.362898 | -1.83644 |
| C | 7.824406 | -3.13509 | 0.472357 | C | -13.7734 | 4.716365 | 0.783468 |
| H | 8.577047 | -3.90335 | 0.388146 | H | -13.3951 | 5.673268 | 1.164702 |
| C | 2.871549 | 0.400913 | 0.776933 | H | -14.3221 | 4.927359 | -0.13897 |
| C | 5.864103 | -2.01901 | 0.772081 | H | -14.4864 | 4.335237 | 1.521362 |
| C | 2.523103 | -2.762   | 2.068623 | C | -15.1177 | -2.26263 | 0.521345 |
| H | 2.552983 | -1.98863 | 2.82949  | H | -15.2579 | -3.21045 | -0.01339 |
| C | 8.055372 | -1.7199  | 0.311909 | H | -15.373  | -2.43864 | 1.570222 |
| C | 4.609531 | 1.823163 | 0.903093 | H | -15.8428 | -1.55221 | 0.11147  |
| C | 10.42919 | -2.02557 | -0.21545 | C | 0.5897   | 0.547664 | 0.194691 |
| C | 3.476571 | -2.74334 | 1.036579 | C | -0.57746 | -0.40951 | 0.022057 |
| C | 10.906   | -2.25042 | -1.51417 | H | 0.804057 | 1.068641 | -0.74698 |
| H | 10.47462 | -1.69654 | -2.34243 | H | 0.361536 | 1.300585 | 0.959849 |
| C | 12.50492 | -3.89982 | -0.70732 | H | -0.3455  | -1.15997 | -0.74424 |
| C | 11.03062 | 0.722786 | -0.26018 | H | -0.78909 | -0.93378 | 0.962561 |

**Table S2.** S<sub>0</sub> optimized geometry of the compound **4** at B3LYP/6-31g (d,p) level of theory.

# Sum of imaginary frequencies= 0

# Total Energy (hartree) = -4030.601435

| Atom | X        | Y        | Z        | Atom | X        | Y        | Z        |
|------|----------|----------|----------|------|----------|----------|----------|
| N    | -8.59871 | -1.40112 | -0.35013 | C    | 4.477481 | 1.84273  | 0.738911 |
| N    | -6.34378 | -0.48352 | -1.26361 | H    | 3.825901 | 2.648125 | 0.436003 |
| N    | -8.14187 | 1.130333 | -0.41549 | C    | 5.413799 | -0.18621 | 1.249148 |
| H    | -8.0242  | 0.075767 | -0.44769 | C    | 12.58207 | 1.064583 | -1.74264 |
| C    | -9.16298 | -3.56872 | -0.85461 | H    | 11.79833 | 1.165194 | -2.48805 |
| H    | -9.06145 | -4.60099 | -1.15878 | C    | 4.597033 | -3.70679 | 0.563355 |
| C    | -9.93556 | -1.50919 | -0.30451 | H    | 5.261193 | -3.77833 | -0.29195 |
| C    | -4.37562 | -1.59279 | -0.82178 | C    | 5.744766 | -1.56619 | 1.244234 |
| H    | -3.69569 | -2.40522 | -0.61551 | C    | 9.991044 | 1.388494 | -0.00119 |

|   |          |          |          |   |          |          |          |
|---|----------|----------|----------|---|----------|----------|----------|
| C | -8.07277 | -2.61084 | -0.70371 | C | 10.45188 | 2.777135 | 0.059697 |
| C | -5.81233 | -1.69798 | -1.06159 | H | 11.47718 | 3.111142 | -0.00307 |
| C | -12.2654 | -0.87795 | 0.155369 | C | 3.621961 | -4.68159 | 0.764487 |
| C | -10.5848 | 0.966166 | 0.025751 | H | 3.548547 | -5.51297 | 0.067684 |
| C | -9.35702 | 1.685669 | -0.19077 | C | 10.83367 | 0.224683 | -0.13051 |
| C | -5.39428 | 0.447157 | -1.05684 | C | 2.839871 | -3.50521 | 2.70532  |
| C | -10.3199 | -2.88682 | -0.61955 | H | 2.159451 | -3.41897 | 3.5491   |
| H | -11.3285 | -3.26923 | -0.67528 | C | 9.34145  | 3.547219 | 0.240537 |
| C | -9.16554 | 3.114796 | -0.23501 | H | 9.302913 | 4.619119 | 0.374393 |
| H | -9.93873 | 3.852978 | -0.09017 | C | 8.203954 | 2.63577  | 0.306806 |
| C | -7.17419 | 2.082041 | -0.61962 | C | 13.02609 | -3.45183 | -1.64647 |
| C | -4.10926 | -0.24536 | -0.81756 | H | 13.33365 | -3.69867 | -2.6599  |
| C | -11.7391 | 1.879586 | 0.355112 | C | 14.92259 | 1.312309 | -1.12332 |
| C | -6.13725 | -4.19108 | -0.99354 | C | 6.358505 | 4.341054 | 0.430556 |
| C | -6.6876  | -2.82093 | -0.93417 | C | 13.29058 | 0.466022 | 0.473243 |
| C | -5.79772 | 1.792477 | -0.85219 | H | 13.06502 | 0.096574 | 1.468519 |
| C | -10.8429 | -0.4201  | -0.03546 | C | 6.844148 | 2.951808 | 0.565074 |
| C | -13.2531 | -0.63346 | -0.80897 | C | 14.59567 | 0.830515 | 0.151646 |
| H | -12.998  | -0.0717  | -1.70184 | H | 15.37496 | 0.739648 | 0.904661 |
| C | -3.86111 | 3.029159 | -1.85005 | C | 2.730456 | -4.60466 | 1.841452 |
| H | -3.85281 | 2.303775 | -2.65713 | C | 13.21491 | -3.75434 | 0.724886 |
| C | -13.8699 | 3.641823 | 1.001475 | H | 13.67367 | -4.23638 | 1.584873 |
| C | -7.839   | 3.352574 | -0.50834 | C | 6.761996 | 5.166409 | -0.63523 |
| H | -7.36654 | 4.315292 | -0.63507 | H | 7.429364 | 4.76633  | -1.39142 |
| C | -4.79945 | 3.851085 | 0.20897  | C | 12.21823 | -2.79933 | 0.926671 |
| H | -5.50161 | 3.754173 | 1.030646 | H | 11.90874 | -2.54952 | 1.937674 |
| C | -13.93   | -2.07928 | 1.462452 | C | 5.453435 | 4.878217 | 1.365393 |
| H | -14.1829 | -2.64165 | 2.358134 | H | 5.132975 | 4.265569 | 2.202013 |
| C | -4.81458 | 2.900235 | -0.82504 | C | 5.398184 | 7.00768  | 0.187533 |
| C | -2.94685 | 4.076511 | -1.84851 | C | 4.987033 | 6.183685 | 1.244481 |
| H | -2.22788 | 4.158178 | -2.66022 | H | 4.295908 | 6.573503 | 1.987943 |
| C | -12.2344 | 1.964346 | 1.663575 | C | 6.289429 | 6.470836 | -0.75086 |
| H | -11.796  | 1.343441 | 2.438861 | H | 6.610256 | 7.080331 | -1.59213 |
| C | -13.3729 | 3.557445 | -0.30414 | O | -2.9551  | 0.414633 | -0.58565 |
| H | -13.8136 | 4.172652 | -1.08496 | O | 2.964536 | -0.10762 | 0.848036 |
| C | -3.87454 | 4.893401 | 0.209434 | C | 14.69508 | -5.1542  | -0.7857  |
| H | -3.87717 | 5.607872 | 1.028927 | H | 15.31967 | -5.28625 | 0.102507 |
| C | -14.9176 | -1.83336 | 0.501828 | H | 14.24571 | -6.12822 | -1.01691 |
| C | -14.5529 | -1.10326 | -0.6375  | H | 15.34956 | -4.89462 | -1.62378 |
| H | -15.2979 | -0.89926 | -1.40293 | C | 16.33619 | 1.726321 | -1.45777 |
| C | -6.54988 | -5.19308 | -0.09534 | H | 16.49785 | 1.760589 | -2.53897 |
| H | -7.27481 | -4.94791 | 0.673748 | H | 16.56366 | 2.723633 | -1.06082 |
| C | -12.6249 | -1.61807 | 1.289793 | H | 17.06846 | 1.035011 | -1.02831 |
| H | -11.8747 | -1.82941 | 2.046422 | C | 4.915102 | 8.433647 | 0.077866 |
| C | -12.3238 | 2.694845 | -0.62295 | H | 5.561219 | 9.114689 | 0.646147 |
| H | -11.9567 | 2.648026 | -1.64438 | H | 4.91511  | 8.777977 | -0.96048 |
| C | -2.93685 | 5.031261 | -0.82084 | H | 3.900991 | 8.545798 | 0.473289 |
| C | -6.01528 | -6.47669 | -0.15835 | C | 1.69912  | -5.6809  | 2.081094 |

|   |          |          |          |   |          |          |          |
|---|----------|----------|----------|---|----------|----------|----------|
| H | -6.34412 | -7.22648 | 0.557148 | H | 1.455677 | -6.21527 | 1.158273 |
| C | -5.15983 | -4.53153 | -1.94736 | H | 2.062727 | -6.42392 | 2.802119 |
| H | -4.83118 | -3.77977 | -2.65778 | H | 0.771946 | -5.26504 | 2.487517 |
| C | -13.281  | 2.827806 | 1.978332 | C | -4.49903 | -8.21914 | -1.20257 |
| H | -13.6468 | 2.870651 | 3.00152  | H | -4.47163 | -8.69984 | -0.22001 |
| C | -4.63141 | -5.81777 | -2.00568 | H | -5.11876 | -8.84846 | -1.85383 |
| H | -3.8839  | -6.0537  | -2.75923 | H | -3.48533 | -8.22692 | -1.61398 |
| C | -5.0507  | -6.81664 | -1.11649 | C | -1.9587  | 6.181091 | -0.8397  |
| N | 6.412305 | 0.7155   | 1.275807 | H | -1.83266 | 6.615676 | 0.156018 |
| N | 8.656083 | 1.35891  | 0.132057 | H | -0.97432 | 5.865065 | -1.19951 |
| N | 8.091199 | -1.10365 | 0.613475 | H | -2.30245 | 6.98274  | -1.50545 |
| H | 8.023183 | -0.05164 | 0.483609 | C | -14.9867 | 4.595512 | 1.354647 |
| C | 7.695859 | -3.26468 | 1.076151 | H | -14.5966 | 5.514734 | 1.809518 |
| H | 7.187155 | -4.16933 | 1.374461 | H | -15.5589 | 4.887287 | 0.469318 |
| C | 9.018044 | -3.14083 | 0.71871  | H | -15.6811 | 4.1503   | 2.074315 |
| H | 9.751813 | -3.92994 | 0.666329 | C | -16.3229 | -2.36068 | 0.670055 |
| C | 4.152406 | 0.524897 | 0.948272 | H | -16.4665 | -3.29544 | 0.11355  |
| C | 7.093771 | -1.96052 | 1.006493 | H | -16.5494 | -2.56836 | 1.719842 |
| C | 3.804995 | -2.52451 | 2.505004 | H | -17.0657 | -1.6477  | 0.298439 |
| H | 3.873298 | -1.68426 | 3.188472 | C | 1.850977 | 0.687858 | 0.436631 |
| C | 9.269035 | -1.74878 | 0.435473 | C | 0.640582 | -0.22719 | 0.324062 |
| C | 5.926843 | 1.909941 | 0.906855 | H | 2.077484 | 1.165251 | -0.52726 |
| C | 11.61324 | -2.14951 | -0.15717 | H | 1.679444 | 1.486197 | 1.173203 |
| C | 4.710481 | -2.6095  | 1.433308 | C | -0.62845 | 0.539071 | -0.06673 |
| C | 12.03214 | -2.496   | -1.44879 | H | 0.86145  | -1.00593 | -0.41594 |
| H | 11.57646 | -2.00728 | -2.30453 | H | 0.498251 | -0.73814 | 1.283745 |
| C | 13.63615 | -4.10009 | -0.56435 | C | -1.82135 | -0.38762 | -0.24864 |
| C | 12.26007 | 0.57092  | -0.47147 | H | -0.87677 | 1.283676 | 0.698805 |
| C | 13.89227 | 1.419921 | -2.06399 | H | -0.47065 | 1.090393 | -1.00168 |
| H | 14.1155  | 1.789303 | -3.06204 | H | -1.63553 | -1.11526 | -1.05157 |
| C | 10.51486 | -1.13724 | 0.053996 | H | -2.03301 | -0.95168 | 0.671004 |

**Table S3.** S<sub>0</sub> optimized geometry of the compound **5** at B3LYP/6-31g (d,p) level of theory.

# Sum of imaginary frequencies= 0

# Total Energy (hartree) = -4109.234714

| Atom | X        | Y        | Z        | Atom | X        | Y        | Z        |
|------|----------|----------|----------|------|----------|----------|----------|
| N    | 9.911595 | 1.360146 | -0.24321 | C    | -13.6526 | -1.38414 | -1.88589 |
| N    | 7.630481 | 0.652095 | -1.2678  | H    | -12.8121 | -1.53856 | -2.55652 |
| N    | 9.327066 | -1.1273  | -0.54849 | C    | -5.96014 | 3.822343 | 0.456935 |
| H    | 9.26423  | -0.06938 | -0.48325 | H    | -6.57669 | 3.805531 | -0.43599 |
| C    | 10.5956  | 3.532128 | -0.53602 | C    | -7.09324 | 1.712117 | 1.252092 |
| H    | 10.55278 | 4.591999 | -0.74404 | C    | -11.1865 | -1.46274 | 0.040143 |
| C    | 11.25139 | 1.392851 | -0.17029 | C    | -11.6186 | -2.85198 | 0.205643 |
| C    | 5.713015 | 1.816011 | -0.74713 | H    | -12.6311 | -3.21818 | 0.118803 |
| H    | 5.071292 | 2.639917 | -0.47455 | C    | -5.0207  | 4.836833 | 0.629523 |



|   |          |          |          |   |          |          |          |
|---|----------|----------|----------|---|----------|----------|----------|
| C | 9.454986 | 2.623447 | -0.48941 | H | -4.92738 | 5.610766 | -0.12836 |
| C | 7.157135 | 1.868702 | -0.95998 | C | -12.0464 | -0.34043 | -0.24777 |
| C | 13.53744 | 0.598869 | 0.258965 | C | -4.32108 | 3.843476 | 2.699867 |
| C | 11.76741 | -1.13302 | -0.06634 | H | -3.6864  | 3.844269 | 3.582774 |
| C | 10.50855 | -1.76399 | -0.36409 | C | -10.5032 | -3.57106 | 0.518291 |
| C | 6.632224 | -0.24305 | -1.15872 | H | -10.448  | -4.62449 | 0.754192 |
| C | 11.71158 | 2.771315 | -0.34996 | C | -9.39258 | -2.62601 | 0.561355 |
| H | 12.73939 | 3.103373 | -0.35655 | C | -14.2138 | 3.121335 | -2.2329  |
| C | 10.24613 | -3.17061 | -0.54786 | H | -14.4568 | 3.26836  | -3.28269 |
| H | 10.97907 | -3.95788 | -0.46557 | C | -16.0261 | -1.63953 | -1.41396 |
| C | 8.31662  | -2.00389 | -0.85597 | C | -7.51627 | -4.25896 | 0.938665 |
| C | 5.380021 | 0.488913 | -0.86809 | C | -14.5361 | -0.59454 | 0.203891 |
| C | 12.868   | -2.13284 | 0.188089 | H | -14.3924 | -0.12921 | 1.173835 |
| C | 7.609336 | 4.324418 | -0.65811 | C | -8.04272 | -2.87827 | 0.920071 |
| C | 8.086664 | 2.927184 | -0.71753 | C | -15.8048 | -1.03035 | -0.17144 |
| C | 6.961991 | -1.62109 | -1.07952 | H | -16.6381 | -0.89832 | 0.514709 |
| C | 12.09665 | 0.237288 | 0.006613 | C | -4.18938 | 4.872053 | 1.755599 |
| C | 14.52637 | 0.404131 | -0.71526 | C | -14.5672 | 3.632012 | 0.083344 |
| H | 14.25641 | -0.04633 | -1.66507 | H | -15.0915 | 4.178367 | 0.863627 |
| C | 4.993705 | -2.64826 | -2.23551 | C | -7.83981 | -5.18848 | -0.06699 |
| H | 5.047189 | -1.84971 | -2.96849 | H | -8.47493 | -4.87764 | -0.88986 |
| C | 14.89304 | -4.0597  | 0.688574 | C | -13.5663 | 2.725678 | 0.436506 |
| C | 8.914043 | -3.31202 | -0.85878 | H | -13.3194 | 2.57775  | 1.484093 |
| H | 8.395316 | -4.23223 | -1.08297 | C | -6.65105 | -4.68201 | 1.965396 |
| C | 5.827488 | -3.71517 | -0.24511 | H | -6.39312 | -3.98679 | 2.757873 |
| H | 6.51023  | -3.73678 | 0.598169 | C | -6.47663 | -6.90552 | 0.991316 |
| C | 15.24112 | 1.563496 | 1.704102 | C | -6.14558 | -5.9782  | 1.989022 |
| H | 15.50881 | 2.013513 | 2.657136 | H | -5.48641 | -6.27907 | 2.799771 |
| C | 5.922379 | -2.67154 | -1.18053 | C | -7.32815 | -6.48298 | -0.03805 |
| C | 4.025047 | -3.63803 | -2.35756 | H | -7.58549 | -7.17568 | -0.83562 |
| H | 3.326382 | -3.60078 | -3.18997 | O | 4.194623 | -0.13306 | -0.70406 |
| C | 13.32506 | -2.37842 | 1.490201 | O | -4.25943 | 0.304046 | 1.123801 |
| H | 12.89782 | -1.82024 | 2.317717 | C | -15.9779 | 4.841784 | -1.64405 |
| C | 14.43349 | -3.81534 | -0.61049 | H | -16.5563 | 5.166678 | -0.77466 |
| H | 14.86256 | -4.36839 | -1.4426  | H | -15.5422 | 5.73742  | -2.10364 |
| C | 4.848478 | -4.69921 | -0.36798 | H | -16.6759 | 4.41534  | -2.37244 |
| H | 4.789839 | -5.48818 | 0.377739 | C | -17.4105 | -2.07682 | -1.83004 |
| C | 16.2302  | 1.365965 | 0.733836 | H | -17.371  | -2.86016 | -2.59266 |
| C | 15.84642 | 0.781122 | -0.48051 | H | -17.9822 | -2.461   | -0.97939 |
| H | 16.59247 | 0.618252 | -1.25476 | H | -17.9817 | -1.23989 | -2.25128 |
| C | 8.05584  | 5.217339 | 0.333564 | C | -5.95104 | -8.31987 | 1.038266 |
| H | 8.751387 | 4.865584 | 1.088376 | H | -6.6113  | -8.96763 | 1.62881  |
| C | 13.91638 | 1.19521  | 1.46916  | H | -5.88124 | -8.75494 | 0.036935 |
| H | 13.16588 | 1.365169 | 2.235901 | H | -4.95938 | -8.36417 | 1.498675 |
| C | 13.43591 | -2.87177 | -0.85783 | C | -3.19789 | 5.991972 | 1.960865 |
| H | 13.09655 | -2.70139 | -1.87569 | H | -2.92221 | 6.462246 | 1.012544 |
| C | 3.93456  | -4.68485 | -1.42849 | H | -3.61435 | 6.776578 | 2.605197 |
| C | 7.591085 | 6.528895 | 0.379576 | H | -2.28207 | 5.633801 | 2.441409 |

|   |          |          |          |   |          |          |          |
|---|----------|----------|----------|---|----------|----------|----------|
| H | 7.945595 | 7.19197  | 1.164937 | C | 6.189204 | 8.438127 | -0.52528 |
| C | 6.670304 | 4.802466 | -1.59164 | H | 6.232599 | 8.852119 | 0.486378 |
| H | 6.31662  | 4.137002 | -2.37266 | H | 6.812006 | 9.076433 | -1.16479 |
| C | 14.32004 | -3.32224 | 1.733421 | H | 5.159678 | 8.527227 | -0.88514 |
| H | 14.65736 | -3.4897  | 2.753616 | C | 2.898466 | -5.77208 | -1.58305 |
| C | 6.211914 | 6.115283 | -1.54061 | H | 2.690104 | -6.26596 | -0.62957 |
| H | 5.493633 | 6.45813  | -2.28148 | H | 1.955984 | -5.37531 | -1.97337 |
| C | 6.665273 | 7.005969 | -0.5576  | H | 3.237547 | -6.54531 | -2.28395 |
| N | -7.70538 | -0.57647 | 1.453136 | C | 15.95396 | -5.09937 | 0.962335 |
| N | -9.86266 | -1.38343 | 0.243706 | H | 15.51178 | -6.03096 | 1.33723  |
| N | -9.3868  | 1.127516 | 0.533476 | H | 16.51564 | -5.34584 | 0.05677  |
| H | -9.28644 | 0.070622 | 0.501226 | H | 16.66667 | -4.75494 | 1.718642 |
| C | -9.07236 | 3.331184 | 0.824782 | C | 17.65885 | 1.793771 | 0.973354 |
| H | -8.60524 | 4.273337 | 1.070438 | H | 17.85946 | 2.778228 | 0.531986 |
| C | -10.3671 | 3.137861 | 0.403411 | H | 17.88142 | 1.864808 | 2.041979 |
| H | -11.1148 | 3.897891 | 0.238495 | H | 18.3681  | 1.090157 | 0.526124 |
| C | -5.43605 | -0.34907 | 1.221665 | C | -3.11773 | -0.49347 | 0.798451 |
| C | -8.43552 | 2.044277 | 0.905679 | C | -1.91019 | 0.425031 | 0.687387 |
| C | -5.25042 | 2.823684 | 2.529248 | H | -3.30221 | -1.02218 | -0.14771 |
| H | -5.33724 | 2.039787 | 3.274719 | H | -2.96788 | -1.25237 | 1.580202 |
| C | -10.567  | 1.719869 | 0.230636 | C | -0.63202 | -0.34014 | 0.324185 |
| C | -7.17166 | -1.78343 | 1.213921 | H | -2.1207  | 1.190374 | -0.06927 |
| C | -12.8769 | 1.997751 | -0.54136 | H | -1.77927 | 0.953384 | 1.639522 |
| C | -6.09678 | 2.796709 | 1.407232 | C | 0.600719 | 0.563881 | 0.198926 |
| C | -13.2156 | 2.215153 | -1.88437 | H | -0.43701 | -1.11253 | 1.081189 |
| H | -12.6919 | 1.665127 | -2.66028 | H | -0.78242 | -0.87497 | -0.62398 |
| C | -14.9088 | 3.847788 | -1.25603 | H | 0.403299 | 1.34205  | -0.55146 |
| C | -13.4371 | -0.75759 | -0.65087 | H | 0.761832 | 1.090687 | 1.149744 |
| C | -14.926  | -1.81091 | -2.26199 | C | 1.867339 | -0.21059 | -0.18412 |
| H | -15.0649 | -2.28973 | -3.22835 | C | 3.088561 | 0.686788 | -0.31688 |
| C | -11.7717 | 1.040901 | -0.169   | H | 1.715322 | -0.73358 | -1.13608 |
| C | -5.71834 | -1.68876 | 1.111173 | H | 2.079554 | -0.9826  | 0.565281 |
| H | -5.03335 | -2.49802 | 0.909509 | H | 2.928528 | 1.465655 | -1.07666 |
| C | -6.72908 | 0.348174 | 1.397126 | H | 3.32135  | 1.189758 | 0.632661 |

**Table S4.**  $S_0$  optimized geometry of the compound **4.4H<sup>+</sup>** at B3LYP/6-31g (d,p) level of theory.

# Sum of imaginary frequencies= 0

# Total Energy (hartree) = -4031.929924

| Atom | X        | Y        | Z        | Atom | X        | Y        | Z        |
|------|----------|----------|----------|------|----------|----------|----------|
| N    | -8.56845 | -1.54279 | -0.1891  | C    | 5.30431  | -0.12402 | 1.453405 |
| N    | -6.28036 | -0.65124 | -1.53253 | C    | 12.45559 | 1.464856 | -1.17193 |
| N    | -8.05055 | 1.199429 | -0.70771 | H    | 11.64607 | 1.973687 | -1.68456 |
| H    | -7.92187 | 0.202492 | -0.64102 | C    | 4.423745 | -3.67777 | 1.132661 |
| C    | -9.1836  | -3.05549 | -1.72405 | H    | 5.057187 | -3.87119 | 0.273733 |
| H    | -9.1376  | -3.83005 | -2.47626 | C    | 5.614531 | -1.49163 | 1.544011 |
| C    | -9.9137  | -1.29993 | -0.46176 | C    | 9.95378  | 1.221253 | 0.304083 |
| C    | -4.40405 | -1.70431 | -0.87761 | C    | 10.37089 | 2.267888 | 1.132453 |
| H    | -3.75264 | -2.46367 | -0.47542 | H    | 11.33747 | 2.329081 | 1.610717 |
| C    | -8.11063 | -2.61998 | -0.95633 | C    | 3.451809 | -4.60299 | 1.488741 |
| C    | -5.783   | -1.8923  | -1.17281 | H    | 3.355607 | -5.52078 | 0.915817 |
| C    | -12.1405 | -0.63856 | 0.242306 | C    | 10.74896 | 0.034556 | -0.02788 |
| C    | -10.4223 | 1.180624 | 0.120483 | C    | 2.720351 | -3.16465 | 3.277589 |
| C    | -9.19463 | 1.842197 | -0.30356 | H    | 2.074138 | -2.96949 | 4.128665 |
| C    | -5.31947 | 0.349423 | -1.42807 | C    | 9.286885 | 3.150708 | 1.324495 |
| C    | -10.2977 | -2.24506 | -1.41811 | H    | 9.268187 | 4.017512 | 1.969609 |
| H    | -11.2647 | -2.2798  | -1.89829 | C    | 8.199456 | 2.658374 | 0.613726 |
| C    | -8.90483 | 3.227669 | -0.38879 | C    | 12.72673 | -3.21041 | -2.24153 |
| H    | -9.57246 | 4.031999 | -0.12848 | H    | 13.06728 | -3.14327 | -3.27016 |
| C    | -7.04475 | 2.090914 | -1.0273  | C    | 14.84365 | 1.186723 | -0.78245 |
| C    | -4.10222 | -0.3533  | -1.05376 | C    | 6.43583  | 4.465613 | 0.458889 |
| C    | -11.4414 | 2.081125 | 0.713299 | C    | 13.24492 | -0.24359 | 0.367988 |
| C    | -6.28271 | -4.36777 | -1.03219 | H    | 13.04987 | -1.01783 | 1.099273 |
| C    | -6.68273 | -2.98135 | -1.03146 | C    | 6.785415 | 3.076865 | 0.637729 |
| C    | -5.67813 | 1.704146 | -1.32956 | C    | 14.54806 | 0.154401 | 0.131174 |
| C    | -10.7503 | -0.19683 | 0.023229 | H    | 15.35967 | -0.32748 | 0.667486 |
| C    | -13.2608 | 0.034237 | -0.31829 | C    | 2.594853 | -4.37754 | 2.579733 |
| H    | -13.105  | 0.904629 | -0.94315 | C    | 12.71562 | -4.3252  | -0.09895 |
| C    | -3.77673 | 2.69702  | -2.58881 | H    | 13.08345 | -5.10914 | 0.556669 |
| H    | -3.85575 | 1.879069 | -3.29792 | C    | 7.295897 | 5.342221 | -0.25617 |
| C    | -13.3415 | 3.809429 | 1.931146 | H    | 8.20648  | 4.952525 | -0.69792 |
| C    | -7.60855 | 3.377152 | -0.87444 | C    | 11.81014 | -3.39914 | 0.390468 |
| H    | -7.11359 | 4.31073  | -1.09062 | H    | 11.49656 | -3.45613 | 1.427606 |
| C    | -4.54649 | 3.835942 | -0.59656 | C    | 5.247419 | 5.016553 | 1.007262 |
| H    | -5.17636 | 3.876643 | 0.28561  | H    | 4.599271 | 4.395419 | 1.615756 |
| C    | -13.6783 | -2.27134 | 1.201568 | C    | 5.793563 | 7.219565 | 0.121722 |
| H    | -13.8447 | -3.15544 | 1.809488 | C    | 4.942392 | 6.356263 | 0.839485 |
| C    | -4.65959 | 2.750262 | -1.49039 | H    | 4.041342 | 6.759088 | 1.292354 |
| C    | -2.85175 | 3.709257 | -2.80457 | C    | 6.974262 | 6.676461 | -0.42447 |
| H    | -2.20965 | 3.665924 | -3.67969 | H    | 7.642908 | 7.319708 | -0.98882 |
| C    | -11.9385 | 1.823514 | 2.014508 | O    | -2.95962 | 0.290914 | -0.82206 |
| H    | -11.5715 | 0.96396  | 2.565011 | O    | 2.948838 | -0.06154 | 0.831958 |
| C    | -12.8689 | 4.049277 | 0.620794 | C    | 14.13132 | -5.30344 | -1.95614 |
| H    | -13.2603 | 4.894944 | 0.062841 | H    | 14.92816 | -5.51441 | -1.23615 |
| C    | -3.60206 | 4.831224 | -0.80938 | H    | 13.60261 | -6.2501  | -2.12702 |
| H    | -3.52499 | 5.651001 | -0.10098 | H    | 14.58479 | -5.00134 | -2.90212 |
| C    | -14.7897 | -1.59528 | 0.648382 | C    | 16.25584 | 1.623344 | -1.03104 |

|   |          |          |          |   |          |          |          |
|---|----------|----------|----------|---|----------|----------|----------|
| C | -14.5447 | -0.44187 | -0.12521 | H | 16.41144 | 1.900546 | -2.0775  |
| H | -15.3806 | 0.073865 | -0.58772 | H | 16.48689 | 2.512979 | -0.42941 |
| C | -7.11349 | -5.3615  | -0.44793 | H | 16.97585 | 0.8491   | -0.75787 |
| H | -8.04044 | -5.06659 | 0.03151  | C | 5.478524 | 8.68025  | -0.02847 |
| C | -12.3883 | -1.82789 | 0.97913  | H | 6.085263 | 9.274625 | 0.666593 |
| H | -11.5539 | -2.36679 | 1.41552  | H | 5.711687 | 9.036666 | -1.03623 |
| C | -11.9281 | 3.222085 | 0.031009 | H | 4.42915  | 8.894529 | 0.185109 |
| H | -11.6089 | 3.41736  | -0.98745 | C | 1.596545 | -5.41987 | 3.00728  |
| C | -2.75047 | 4.801589 | -1.92695 | H | 1.240809 | -6.00954 | 2.157997 |
| C | -6.74307 | -6.69401 | -0.45302 | H | 2.055801 | -6.12041 | 3.715648 |
| H | -7.39046 | -7.43004 | 0.014208 | H | 0.735121 | -4.97258 | 3.510331 |
| C | -5.0702  | -4.7983  | -1.63444 | C | -5.1707  | -8.57188 | -1.0975  |
| H | -4.44133 | -4.07885 | -2.14726 | H | -5.49673 | -9.09683 | -0.19551 |
| C | -12.8512 | 2.680481 | 2.610732 | H | -5.66216 | -9.0619  | -1.94812 |
| H | -13.1944 | 2.476161 | 3.620233 | H | -4.09419 | -8.7142  | -1.21789 |
| C | -4.71581 | -6.13585 | -1.63991 | C | -1.78378 | 5.924555 | -2.19331 |
| H | -3.79657 | -6.44293 | -2.12996 | H | -1.44517 | 6.393558 | -1.26559 |
| C | -5.53963 | -7.11688 | -1.05213 | H | -0.90982 | 5.581142 | -2.75325 |
| N | 6.300738 | 0.845856 | 1.430211 | H | -2.26389 | 6.707156 | -2.79368 |
| N | 8.61834  | 1.475258 | -0.00558 | C | -14.3293 | 4.741676 | 2.569576 |
| N | 8.0004   | -1.15838 | 0.86029  | H | -13.8401 | 5.683963 | 2.848015 |
| H | 7.902933 | -0.17871 | 0.646267 | H | -15.1366 | 5.000088 | 1.876972 |
| C | 7.492658 | -3.27192 | 1.349155 | H | -14.7675 | 4.315071 | 3.473866 |
| H | 6.970407 | -4.14671 | 1.702845 | C | -16.1818 | -2.11476 | 0.846046 |
| C | 8.792723 | -3.23606 | 0.851629 | H | -16.4177 | -2.8612  | 0.075156 |
| H | 9.434814 | -4.09054 | 0.718031 | H | -16.2937 | -2.60996 | 1.814108 |
| C | 4.11265  | 0.567964 | 0.988501 | H | -16.9273 | -1.32042 | 0.764329 |
| C | 6.967923 | -1.96136 | 1.305659 | C | 1.841343 | 0.678599 | 0.269564 |
| C | 3.674548 | -2.22346 | 2.916782 | C | 0.627683 | -0.2449  | 0.256075 |
| H | 3.773591 | -1.30843 | 3.491961 | H | 2.106992 | 1.005932 | -0.7434  |
| C | 9.124498 | -1.88834 | 0.561994 | H | 1.659663 | 1.566182 | 0.888425 |
| C | 5.84735  | 2.048928 | 0.916753 | C | -0.63072 | 0.466514 | -0.27252 |
| C | 11.3559  | -2.33399 | -0.42416 | H | 0.862298 | -1.11926 | -0.36219 |
| C | 4.562449 | -2.46981 | 1.848866 | H | 0.459872 | -0.61081 | 1.275463 |
| C | 11.85016 | -2.25524 | -1.74964 | C | -1.83301 | -0.46995 | -0.32863 |
| H | 11.50811 | -1.45679 | -2.3992  | H | -0.883   | 1.320667 | 0.366372 |
| C | 13.18366 | -4.26468 | -1.43135 | H | -0.45358 | 0.86224  | -1.27928 |
| C | 12.15619 | 0.391522 | -0.29008 | H | -1.64785 | -1.31094 | -1.00817 |
| C | 13.76349 | 1.82672  | -1.43314 | H | -2.08035 | -0.86849 | 0.663313 |
| H | 13.96927 | 2.617498 | -2.14822 | H | 8.173338 | 1.131764 | -0.84872 |
| C | 10.37218 | -1.33152 | 0.053179 | H | 7.070279 | 0.825349 | 2.087089 |
| C | 4.46104  | 1.875122 | 0.646807 | H | -7.04834 | -0.57696 | -2.18757 |
| H | 3.834885 | 2.601832 | 0.154197 | H | -8.13118 | -1.29343 | 0.690354 |

**Table S5.** S<sub>0</sub> optimized geometry of the compound **4-Re** at B3LYP/6-31g (d,p) and LANL2DZ level of theory.

# Sum of imaginary frequencies= 0

# Total Energy (hartree) = -4867.815065

| Atom | X        | Y        | Z        | Atom | X        | Y        | Z        |
|------|----------|----------|----------|------|----------|----------|----------|
| N    | -8.70635 | -1.40527 | -0.02794 | C    | 9.792483 | 1.480916 | -0.51687 |
| N    | -6.41528 | -0.72175 | -1.18696 | C    | 9.943631 | 2.810345 | -1.08619 |
| N    | -8.0698  | 1.209226 | -0.46626 | H    | 10.75697 | 3.129794 | -1.71991 |
| C    | -8.89231 | -3.33802 | 1.185923 | C    | 3.244022 | -4.27087 | -0.78993 |
| H    | -8.67858 | -4.32306 | 1.572555 | H    | 2.952334 | -4.68341 | -1.75286 |
| C    | -9.77284 | -1.28136 | 0.790145 | C    | 10.6702  | 0.363455 | -0.7642  |
| C    | -4.48897 | -1.8353  | -0.66797 | C    | 2.981828 | -4.13867 | 1.593487 |
| H    | -3.83682 | -2.63397 | -0.35205 | H    | 2.49142  | -4.45579 | 2.510737 |
| C    | -8.07973 | -2.60806 | 0.233206 | C    | 8.846461 | 3.536887 | -0.71855 |
| C    | -5.92657 | -1.9195  | -0.77879 | H    | 8.614943 | 4.554883 | -0.99361 |
| C    | -11.949  | -0.41007 | 1.533701 | C    | 8.002711 | 2.660542 | 0.068692 |
| C    | -10.2585 | 1.244136 | 0.732335 | C    | 12.77436 | -3.15238 | -2.81252 |
| C    | -9.01593 | 1.82162  | 0.279777 | H    | 13.00761 | -3.32319 | -3.86084 |
| C    | -5.41611 | 0.202229 | -1.16553 | C    | 14.66612 | 1.63198  | -1.90333 |
| C    | -9.92827 | -2.51916 | 1.536741 | C    | 6.002996 | 4.18597  | 0.243354 |
| H    | -10.6996 | -2.7151  | 2.266267 | C    | 13.07036 | 0.885629 | -0.21999 |
| C    | -8.54552 | 3.152263 | 0.618322 | H    | 12.85009 | 0.632776 | 0.812846 |
| H    | -9.08712 | 3.872595 | 1.213018 | C    | 6.657031 | 2.864535 | 0.449888 |
| C    | -6.9615  | 2.025419 | -0.53943 | C    | 14.35195 | 1.298563 | -0.57843 |
| C    | -4.16621 | -0.51834 | -0.91387 | H    | 15.12169 | 1.365066 | 0.186976 |
| C    | -11.2863 | 2.290902 | 1.085252 | C    | 2.592977 | -4.70565 | 0.371587 |
| C    | -6.15574 | -4.23363 | 0.11212  | C    | 13.1383  | -3.62298 | -0.48747 |
| C    | -6.77403 | -2.91838 | -0.21091 | H    | 13.66096 | -4.16212 | 0.299061 |
| C    | -5.68779 | 1.58441  | -0.98279 | C    | 5.938451 | 4.811055 | -1.01216 |
| C    | -10.5881 | -0.1035  | 0.957534 | H    | 6.365997 | 4.315869 | -1.87841 |
| C    | -13.0173 | -0.6933  | 0.67152  | C    | 12.15312 | -2.69914 | -0.14206 |
| H    | -12.8622 | -0.65039 | -0.40251 | H    | 11.91969 | -2.52083 | 0.903505 |
| C    | -3.96214 | 2.789968 | -2.32455 | C    | 5.391067 | 4.826129 | 1.334174 |
| H    | -4.32561 | 2.255167 | -3.19711 | H    | 5.427422 | 4.356704 | 2.312785 |
| C    | -13.1702 | 4.327648 | 1.668219 | C    | 4.710605 | 6.693385 | -0.07293 |
| C    | -7.28424 | 3.280494 | 0.10442  | C    | 4.763216 | 6.059678 | 1.17612  |
| H    | -6.62184 | 4.127743 | 0.199077 | H    | 4.307733 | 6.53921  | 2.039117 |
| C    | -4.0802  | 3.260171 | 0.035564 | C    | 5.302014 | 6.041935 | -1.16339 |
| H    | -4.51222 | 3.074251 | 1.01421  | H    | 5.256514 | 6.5      | -2.14845 |
| C    | -13.4336 | -0.79696 | 3.41831  | O    | -2.97727 | 0.106697 | -0.85809 |
| H    | -13.5851 | -0.83254 | 4.494638 | O    | 2.962204 | -0.35562 | 0.488237 |
| C    | -4.56629 | 2.561552 | -1.07896 | C    | 14.50474 | -4.90126 | -2.19731 |
| C    | -2.91918 | 3.704024 | -2.45099 | H    | 15.32125 | -4.92404 | -1.46886 |

|   |          |          |          |    |          |          |          |
|---|----------|----------|----------|----|----------|----------|----------|
| H | -2.47426 | 3.872269 | -3.4288  | H  | 14.07273 | -5.90956 | -2.22987 |
| C | -11.426  | 2.78779  | 2.386722 | H  | 14.9355  | -4.69961 | -3.18255 |
| H | -10.8048 | 2.388345 | 3.183238 | C  | 16.05328 | 2.100413 | -2.27579 |
| C | -13.0288 | 3.823372 | 0.368377 | H  | 16.19219 | 2.11801  | -3.3605  |
| H | -13.6546 | 4.216572 | -0.4294  | H  | 16.24512 | 3.113593 | -1.90164 |
| C | -3.02875 | 4.166261 | -0.097   | H  | 16.82337 | 1.449749 | -1.84778 |
| H | -2.66222 | 4.689652 | 0.782965 | C  | 4.055695 | 8.044592 | -0.23279 |
| C | -14.5061 | -1.07531 | 2.562065 | H  | 4.764263 | 8.854087 | -0.01698 |
| C | -14.2749 | -1.01282 | 1.181544 | H  | 3.690955 | 8.195665 | -1.25309 |
| H | -15.0906 | -1.21958 | 0.492646 | H  | 3.210749 | 8.16439  | 0.452217 |
| C | -6.02723 | -4.70832 | 1.427418 | C  | 1.524277 | -5.77149 | 0.314654 |
| H | -6.37388 | -4.09522 | 2.253407 | H  | 1.055487 | -5.8174  | -0.6728  |
| C | -12.1747 | -0.46824 | 2.914603 | H  | 1.944278 | -6.76369 | 0.522458 |
| H | -11.3598 | -0.25431 | 3.600656 | H  | 0.738948 | -5.59309 | 1.056052 |
| C | -12.0977 | 2.828212 | 0.075844 | C  | -4.32793 | -8.0945  | 0.924999 |
| H | -12.0073 | 2.450635 | -0.93842 | H  | -3.86367 | -8.12783 | 1.915192 |
| C | -2.43418 | 4.410701 | -1.34178 | H  | -5.08832 | -8.88503 | 0.895816 |
| C | -5.42883 | -5.94049 | 1.684838 | H  | -3.56624 | -8.3512  | 0.182631 |
| H | -5.33193 | -6.28055 | 2.713057 | C  | -1.32356 | 5.423584 | -1.49006 |
| C | -5.64518 | -5.0251  | -0.93031 | H  | -0.75293 | 5.532574 | -0.5628  |
| H | -5.73127 | -4.67338 | -1.95414 | H  | -0.628   | 5.142187 | -2.28668 |
| C | -12.3524 | 3.791768 | 2.670528 | H  | -1.72289 | 6.413559 | -1.7443  |
| H | -12.4431 | 4.161334 | 3.68922  | C  | -14.1572 | 5.430628 | 1.970382 |
| C | -5.05458 | -6.2588  | -0.66516 | H  | -13.7549 | 6.412296 | 1.690042 |
| H | -4.67795 | -6.85691 | -1.49132 | H  | -15.0908 | 5.295259 | 1.414939 |
| C | -4.94003 | -6.74276 | 0.645038 | H  | -14.4006 | 5.469578 | 3.036166 |
| N | 6.335293 | 0.553351 | 1.125956 | C  | -15.8628 | -1.45564 | 3.106793 |
| N | 8.664632 | 1.458329 | 0.224818 | H  | -15.9891 | -2.5454  | 3.134074 |
| N | 8.120995 | -1.21232 | 0.307486 | H  | -16.0033 | -1.08564 | 4.126745 |
| C | 7.465185 | -3.21276 | -0.58796 | H  | -16.67   | -1.05328 | 2.486698 |
| H | 6.84645  | -4.05988 | -0.843   | C  | 1.828017 | 0.43275  | 0.11613  |
| C | 8.750503 | -2.97239 | -0.98988 | C  | 0.630256 | -0.5007  | 0.018079 |
| H | 9.360809 | -3.58361 | -1.63795 | H  | 2.027636 | 0.931108 | -0.84318 |
| C | 4.118578 | 0.301438 | 0.683857 | H  | 1.659355 | 1.212146 | 0.87246  |
| C | 7.046825 | -2.0683  | 0.192785 | C  | -0.6422  | 0.241975 | -0.40633 |
| C | 3.98635  | -3.17646 | 1.655144 | H  | 0.867605 | -1.29927 | -0.69487 |
| H | 4.275334 | -2.75214 | 2.612211 | H  | 0.486381 | -0.98269 | 0.992623 |
| C | 9.139937 | -1.68562 | -0.44324 | C  | -1.85443 | -0.6771  | -0.44446 |
| C | 5.819936 | 1.772816 | 0.830937 | H  | -0.8558  | 1.066693 | 0.284304 |
| C | 11.47354 | -1.97506 | -1.13205 | H  | -0.51249 | 0.69009  | -1.39863 |
| C | 4.64826  | -2.75753 | 0.490873 | H  | -1.70505 | -1.5051  | -1.1519  |
| C | 11.797   | -2.21703 | -2.47304 | H  | -2.05512 | -1.11085 | 0.545338 |
| H | 11.27899 | -1.67211 | -3.25658 | Re | -8.40058 | -0.37017 | -1.90648 |
| C | 13.46326 | -3.87139 | -1.82752 | Re | 8.281407 | 0.191136 | 1.942466 |
| C | 12.05816 | 0.781833 | -1.18519 | C  | -10.2507 | 0.018913 | -2.30093 |
| C | 13.65078 | 1.531124 | -2.86118 | C  | -8.50029 | -1.96047 | -2.99928 |
| H | 13.86669 | 1.779106 | -3.89772 | C  | -7.85147 | 0.66333  | -3.44246 |
| C | 10.38464 | -1.01289 | -0.72815 | C  | 10.11611 | -0.17111 | 2.425148 |

|   |          |          |          |   |          |          |          |
|---|----------|----------|----------|---|----------|----------|----------|
| C | 4.397136 | 1.649379 | 0.614564 | C | 8.226519 | 1.637279 | 3.223161 |
| H | 3.731152 | 2.455148 | 0.349768 | C | 7.683819 | -1.04669 | 3.298052 |
| C | 5.382196 | -0.39771 | 0.927843 | O | -11.37   | 0.260053 | -2.52907 |
| C | 12.36637 | 1.111823 | -2.5103  | O | -8.5273  | -2.93884 | -3.63014 |
| H | 11.59723 | 1.038923 | -3.2745  | O | -7.47413 | 1.294532 | -4.34555 |
| C | 4.258402 | -3.31545 | -0.73477 | O | 11.22603 | -0.39755 | 2.707094 |
| H | 4.735918 | -2.98189 | -1.6511  | O | 7.281807 | -1.80278 | 4.087515 |
| C | 5.727819 | -1.73459 | 0.596237 | O | 8.158583 | 2.529423 | 3.968387 |

**Table S6.** S<sub>0</sub> optimized geometry of the compound **4-Re'** at B3LYP/6-31g (d,p) and LANL2DZ level of theory.

# Sum of imaginary frequencies= 0

# Total Energy (hartree) = -4867.803411

| Atom | X        | Y        | Z        | Atom | X        | Y        | Z        |
|------|----------|----------|----------|------|----------|----------|----------|
| N    | -8.6498  | -1.33038 | -0.00046 | C    | 9.570906 | 1.39564  | 1.009498 |
| N    | -6.53121 | -0.3205  | -1.24428 | C    | 9.612478 | 2.76959  | 1.484096 |
| N    | -7.99188 | 1.30524  | 0.237443 | H    | 10.23471 | 3.12855  | 2.290475 |
| C    | -8.71215 | -3.52755 | 0.642198 | C    | 3.048656 | -4.27912 | -1.68587 |
| H    | -8.47299 | -4.57854 | 0.702851 | H    | 2.751798 | -4.71736 | -2.63572 |
| C    | -9.57732 | -1.45319 | 0.971914 | C    | 10.32002 | 0.305659 | 1.587471 |
| C    | -4.58758 | -1.5145  | -1.36805 | C    | 2.784798 | -4.06789 | 0.691789 |
| H    | -3.92251 | -2.36295 | -1.39513 | H    | 2.272582 | -4.3307  | 1.614351 |
| C    | -8.02864 | -2.55058 | -0.18216 | C    | 8.664445 | 3.466419 | 0.790296 |
| C    | -6.02735 | -1.57961 | -1.27158 | H    | 8.366149 | 4.49533  | 0.930339 |
| C    | -11.5917 | -0.85551 | 2.244472 | C    | 8.030255 | 2.529074 | -0.11544 |
| C    | -9.97719 | 0.976846 | 1.713214 | C    | 12.85244 | -3.4386  | 2.37707  |
| C    | -8.79519 | 1.670754 | 1.261689 | H    | 13.66364 | -3.89221 | 1.81253  |
| C    | -5.50977 | 0.570163 | -1.12052 | C    | 14.02136 | 1.747422 | 3.342171 |
| C    | -9.65765 | -2.8516  | 1.360517 | C    | 6.289905 | 4.115734 | -0.9198  |
| H    | -10.3157 | -3.25109 | 2.117621 | C    | 11.72744 | 0.973663 | 3.606378 |
| C    | -8.23505 | 2.855624 | 1.885242 | H    | 10.88718 | 0.752436 | 4.257513 |
| H    | -8.65733 | 3.374182 | 2.732923 | C    | 6.80465  | 2.722744 | -0.79364 |
| C    | -6.88034 | 2.120463 | 0.228786 | C    | 12.91633 | 1.455646 | 4.152635 |
| C    | -4.26157 | -0.17823 | -1.28345 | H    | 12.98765 | 1.603478 | 5.227664 |
| C    | -10.9068 | 1.867497 | 2.500646 | C    | 2.377206 | -4.65375 | -0.51334 |
| C    | -6.19419 | -4.05325 | -1.04093 | C    | 11.65495 | -3.13134 | 4.433237 |
| C    | -6.81288 | -2.70791 | -0.88593 | H    | 11.52209 | -3.34027 | 5.492228 |
| C    | -5.70393 | 1.839489 | -0.51365 | C    | 6.983478 | 5.02916  | -1.73054 |

|   |          |          |          |   |          |          |          |
|---|----------|----------|----------|---|----------|----------|----------|
| C | -10.3192 | -0.38024 | 1.587053 | H | 7.870168 | 4.698031 | -2.26291 |
| C | -12.763  | -0.96517 | 1.48215  | C | 10.7773  | -2.25604 | 3.792888 |
| H | -12.7507 | -0.6637  | 0.438846 | H | 9.971388 | -1.79454 | 4.357261 |
| C | -4.17228 | 3.399277 | -1.71783 | C | 5.139342 | 4.561758 | -0.25147 |
| H | -4.68365 | 3.126391 | -2.63621 | H | 4.603138 | 3.882215 | 0.403774 |
| C | -12.6187 | 3.629133 | 3.915515 | C | 5.378449 | 6.786461 | -1.21502 |
| C | -7.06092 | 3.137285 | 1.242198 | C | 4.694931 | 5.874962 | -0.3995  |
| H | -6.36464 | 3.930431 | 1.46977  | H | 3.804783 | 6.199491 | 0.134235 |
| C | -3.90649 | 3.183181 | 0.667146 | C | 6.528468 | 6.33785  | -1.87817 |
| H | -4.18542 | 2.722076 | 1.60975  | H | 7.07552  | 7.02135  | -2.52285 |
| C | -12.8149 | -1.72521 | 4.155472 | O | -3.05743 | 0.418972 | -1.25005 |
| H | -12.8236 | -2.01923 | 5.202459 | O | 3.00034  | -0.36293 | -1.2054  |
| C | -4.58058 | 2.818971 | -0.50681 | C | 13.64066 | -4.70852 | 4.424615 |
| C | -3.1375  | 4.329985 | -1.74583 | H | 13.69788 | -4.51594 | 5.500172 |
| H | -2.84711 | 4.774878 | -2.69458 | H | 13.30265 | -5.74468 | 4.296324 |
| C | -10.8002 | 2.010336 | 3.890101 | H | 14.65363 | -4.64663 | 4.015062 |
| H | -10.052  | 1.438559 | 4.431969 | C | 15.30022 | 2.291424 | 3.934203 |
| C | -12.7232 | 3.478782 | 2.526971 | H | 16.17212 | 1.994064 | 3.343802 |
| H | -13.4758 | 4.044339 | 1.982862 | H | 15.28851 | 3.388401 | 3.965724 |
| C | -2.86358 | 4.108535 | 0.629748 | H | 15.44904 | 1.939156 | 4.959464 |
| H | -2.3498  | 4.370126 | 1.55179  | C | 4.909716 | 8.215509 | -1.35283 |
| C | -13.99   | -1.83019 | 3.400798 | H | 5.421117 | 8.870563 | -0.63628 |
| C | -13.9424 | -1.43718 | 2.056869 | H | 5.114901 | 8.608503 | -2.35321 |
| H | -14.841  | -1.50277 | 1.448073 | H | 3.835494 | 8.305387 | -1.16634 |
| C | -5.88887 | -4.87817 | 0.053132 | C | 1.267258 | -5.67764 | -0.54842 |
| H | -6.09371 | -4.52851 | 1.060148 | H | 0.665351 | -5.58559 | -1.45803 |
| C | -11.6341 | -1.24468 | 3.589176 | H | 1.67016  | -6.69812 | -0.53065 |
| H | -10.7368 | -1.17152 | 4.197046 | H | 0.599833 | -5.57625 | 0.312529 |
| C | -11.8779 | 2.619029 | 1.825871 | C | -4.37333 | -7.95833 | -1.62905 |
| H | -11.9784 | 2.517103 | 0.749299 | H | -3.85535 | -8.30704 | -0.73091 |
| C | -2.46506 | 4.704025 | -0.57357 | H | -5.14262 | -8.70195 | -1.87202 |
| C | -5.29417 | -6.12456 | -0.13815 | H | -3.65634 | -7.95513 | -2.456   |
| H | -5.05878 | -6.74003 | 0.726706 | C | -1.36287 | 5.736238 | -0.60815 |
| C | -5.86422 | -4.51134 | -2.3279  | H | -0.71335 | 5.659189 | 0.268851 |
| H | -6.08923 | -3.88626 | -3.18696 | H | -0.74119 | 5.629486 | -1.50292 |
| C | -11.6425 | 2.878739 | 4.583829 | H | -1.77406 | 6.753399 | -0.62177 |
| H | -11.542  | 2.970936 | 5.66283  | C | -13.5116 | 4.589075 | 4.666171 |
| C | -5.2764  | -5.76075 | -2.51104 | H | -13.0505 | 5.581851 | 4.745327 |
| H | -5.04195 | -6.09572 | -3.51852 | H | -14.4738 | 4.718181 | 4.161657 |
| C | -4.98436 | -6.59313 | -1.42149 | H | -13.7073 | 4.240887 | 5.685063 |
| N | 6.474797 | 0.353043 | -1.13195 | C | -15.262  | -2.37382 | 4.008029 |
| N | 8.664228 | 1.311007 | 0.014645 | H | -15.3676 | -3.44876 | 3.813875 |
| N | 7.945536 | -1.31724 | 0.270717 | H | -15.2786 | -2.23591 | 5.093269 |
| C | 7.014014 | -3.16334 | 1.248723 | H | -16.1463 | -1.88241 | 3.590548 |
| H | 6.312034 | -3.95264 | 1.472678 | C | 1.859303 | 0.498605 | -1.2528  |
| C | 8.209645 | -2.9177  | 1.86688  | C | 0.618085 | -0.38168 | -1.23722 |
| H | 8.646659 | -3.47003 | 2.684875 | H | 1.899321 | 1.111078 | -2.16446 |
| C | 4.208119 | 0.226538 | -1.21346 | H | 1.878405 | 1.177682 | -0.38839 |



|   |          |          |          |    |          |          |          |
|---|----------|----------|----------|----|----------|----------|----------|
| C | 6.822689 | -2.11819 | 0.26797  | C  | -0.67381 | 0.444036 | -1.2519  |
| C | 3.834752 | -3.1506  | 0.730042 | H  | 0.656059 | -1.051   | -2.10504 |
| H | 4.122255 | -2.69774 | 1.674195 | H  | 0.656603 | -1.02045 | -0.34677 |
| C | 8.769665 | -1.72235 | 1.263489 | C  | -1.91301 | -0.43916 | -1.26674 |
| C | 5.982374 | 1.617413 | -1.16379 | H  | -0.72319 | 1.098047 | -0.37308 |
| C | 10.92576 | -1.96199 | 2.431482 | H  | -0.70214 | 1.09798  | -2.13174 |
| C | 4.506448 | -2.78482 | -0.44474 | H  | -1.93954 | -1.06816 | -2.1676  |
| C | 11.9756  | -2.5695  | 1.729304 | H  | -1.94095 | -1.10286 | -0.39086 |
| H | 12.10785 | -2.35172 | 0.673711 | Re | -8.588   | 0.203008 | -1.5273  |
| C | 12.70724 | -3.73949 | 3.737665 | Re | 8.517245 | -0.20583 | -1.50218 |
| C | 11.6036  | 0.773215 | 2.225332 | C  | -10.4643 | 0.661808 | -1.51538 |
| C | 13.89372 | 1.542581 | 1.962435 | C  | -8.89057 | -1.00319 | -3.00544 |
| H | 14.73697 | 1.754515 | 1.309454 | C  | -8.2401  | 1.648007 | -2.76036 |
| C | 9.971912 | -1.0514  | 1.697432 | C  | 8.093201 | -1.62942 | -2.74071 |
| C | 4.544816 | 1.561131 | -1.30067 | C  | 8.80396  | 1.0175   | -2.96746 |
| H | 3.881986 | 2.407454 | -1.3773  | C  | 10.38276 | -0.6978  | -1.55574 |
| C | 5.446885 | -0.53109 | -1.02891 | O  | -11.5983 | 0.938357 | -1.497   |
| C | 12.70276 | 1.074583 | 1.408643 | O  | -9.03366 | -1.75685 | -3.88143 |
| H | 12.62799 | 0.919384 | 0.336301 | O  | -7.98195 | 2.523011 | -3.48417 |
| C | 4.090813 | -3.35641 | -1.65711 | O  | 7.789491 | -2.48674 | -3.46775 |
| H | 4.601946 | -3.08349 | -2.57564 | O  | 11.51426 | -0.98471 | -1.57153 |
| C | 5.636177 | -1.81225 | -0.44835 | O  | 8.947347 | 1.792429 | -3.82521 |

---
